# Supplementary material for: Localization of KRAS downstream target ARL4C to invasive pseudopods accelerates pancreatic cancer cell invasion
Source: eLife. 2021 Sep 30;10:e66721. doi: 10.7554/eLife.66721 (PMC8598236; doi:10.7554/eLife.66721)
Supplement: Figure 1—source data 1. [file elife-66721-fig1-data1.xlsx]

## Sheet: B
	Post operative date	High ARL4C	Low ARL4C	0; alive 1; death
	185	1
	377	0
	813	0
	840	0
	667	1
	540	1
	156	1
	282	1
	1324	1
	401	1
	1933	0
	793	1
	1280	1
	241	1
	450	1
	554	1
	162	1
	2114	0
	346	1
	497	1
	842	1
	387	1
	155	1
	482	0
	497	0
	240	0
	562	1
	516	0
	178	1
	1205	0
	147	1
	369	0
	251	1
	458	1
	671	1
	1687	0
	516	1
	1062	1
	911	1
	1233	0
	975	0
	937	0
	881	0
	838	0
	504	1
	800	0
	699	0
	804		0
	1555		0
	1652		0
	2202		0
	368		1
	1226		1
	1469		0
	844		1
	830		0
	777		0

## Sheet: C
	Normal	Tumor		P value	<0.0001
	10.36	11.79		95% confidence interval	2.776 to 3.263
	8.542	14.13
	9.482	11.36
	9.066	13.03
	9.593	12.31
	8.638	11.33
	8.372	12.03
	9.167	11.35
	9.511	11.62
	9.243	10.92
	8.794	11.41
	8.304	11.1
	8.724	11.68
	8.393	11.74
	9.043	12.16
	9.987	12.01
	9.538	11.65
	9.153	11.82
	9.47	11.83
	7.726	10.36
	8.6	11.97
	8.278	12.32
	9.238	11
	9.416	12.28
	8.393	12.23
	8.81	11.97
	8.432	11.36
	8.877	10.27
	8.126	12.8
	9.901	12.25
	9.132	11.28
	9.146	9.272
	10.83	11.47
	9.291	10.7
	8.913	12.36
	8.293	10.86
	8.812	12.53
	8.54	10.99
	8.552	12.38
	10.52	12.34
	10.67	13.31
	8.442	13.11
	9.092	12.28
	9.258	12.82
	8.472	12.12
	9.278	11.8
	8.342	11.77
	8.831	11.87
	10.31	10.81
	8.846	12.05
	8.304	12.05
	8.98	11.54
	9.794	12.03
	9.602	12.7
	8.424	13.15
	9.188	12.98
	7.907	12.93
	8.644	11.35
	9.057	12.03
	9.596	13.39
	9.762	10.32
	8.625	12.19
	10.56	12.65
	7.988	11.04
	8.764	11.53
	8.503	12.49
	9.152	11.23
	10.08	10.63
	9.452	12.16
	9.013	7.519
	9.036	12.03
	9.252	10.3
	9.053	11.34
	8.667	12.62
	9.545	10.3
	7.716	11.27
	8.089	12.14
	9.172	12.35
	9.758	11.28
	9.26	12.6
	8.051	11.12
	8.439	11.95
	9.172	11.87
	8.608	12.53
	8.443	10.87
	9.236	11.94
	9.073	12.75
	8.202	12.12
	9.917	11.77
	9.032	11.51
	8.733	12.91
	8.898	12.52
	8.983	12.64
	8.511	11.65
	8.83	11.82
	8.833	11.9
	8.549	12.4
	8.625	12.48
	8.404	11.3
	9.59	12.68
	8.285	10.33
	8.345	12.67
	8.528	13.69
	8.757	11.77
	9.869	12.29
	8.54	11.88
	8.714	11.91
	8.021	12.74
	9.578	12.19
	8.657	12.04
	8.531	13.88
	9.043	12.65
	9.494	9.894
	8.632	12.77
	8.426	12.58
	8.272	11.92
	10.83	12.2
	8.18	11.44
	7.375	11.23
	8.167	12.91
	9.062	12.53
	7.861	11.95
	8.91	11.95
	9.667	12.72
	7.913	11.5
	8.63	12.31
	8.544	12.19
	8.606	13.12
	8.335	12.86
	8.524	12.37
	7.804	11.67
	7.999	10.97
	8.706	9.308
	8.252	11.99
	8.882	11.81
	8.522	11.46
	8.598	12.78
	9.165	12.89
	8.633	12.3
	8.987	11.76
	8.523	12.7
	8.133	11.42
	8.167	12.29
	8.578	13
	9.055	11.61
	8.288	11.52
	8.87	11.39
	8.439	13.54
	9.28	11.82
	8.2	11.26
	8.231	12.73
	8.126	12.16
	7.334	12.27
	10.62	12.08
	9.06	12.82
	8.947	10.66
	8.465	10.96
	8.505	10.12
	8.987	12.43
	8.07	7.438
	7.731	11.74
	7.493	11.87
	8.861	12.09
	8.389	11.85
	8.567	12.04
	0	11.03
	0	12.53
		6.196
		11.69
		8.459
		9.755
		12.47
		12.49
		8.916
		10.47
		9.339
		11.63
		7.994
		10.6

## Sheet: D
	Post operative date	High ARL4C	Low ARL4C	0; alive 1; death
	232	0
	103	1
	421	1
	41	1
	657	0
	702	1
	395	0
	603	1
	684	1
	236	1
	153	1
	767	0
	481	1
	473	1
	467	1
	278	1
	1383	0
	596	1
	179	1
	729	0
	660	0
	394	1
	517	1
	568	1
	486	1
	245	0
	292	1
	1059	1
	607	1
	314	0
	467	0
	463	0
	9	0
	969	0
	128	1
	143	1
	31	1
	366	1
	183	1
	462	0
	1116	0
	1130	1
	394	1
	635	0
	366	1
	706	0
	1021	0
	313	1
	440	0
	1037	0
	144	1
	404	0
	420	0
	666	0
	308	1
	277	1
	913	1
	194	0
	466	1
	216	1
	2285	0
	593	1
	379	0
	431	0
	695	1
	458	1
	2036	1
	627	1
	110	1
	584	0
	95	1
	353	1
	338	0
	286	0
	603	0
	1502	1
	666	1
	416	0
	720	0
	160	1
	252	0
	545	1
	95	0
	438	0
	1323	0
	430	1
	969	0
	592	1
	716	0
	80	0
	267	1
	498	0
	293	1
	517	0
	219	1
	392	0
	518	1
	123	1
	308	1
	365	1
	334	1
	4	0
	250	1
	299	1
	676	0
	123	1
	1257	0
	350	0
	920	0
	598	1
	951	0
	586	0
	614	1
	33	0
	470	1
	743	0
	224	1
	225	0
	732	1
	498	1
	522	0
	233	1
	287	0
	460	1
	738	1
	239	1
	388	0
	145	1
	228	0
	117	1
	120	1
	485		1
	1216		0
	661		1
	1942		0
	1854		0
	2741		0
	2084		0
	998		0
	295		0
	482		0
	840		0
	381		1
	12		1
	330		0
	511		1
	7		0
	1542		0
	1103		0
	393		1
	652		1
	454		0
	8		0
	375		1
	737		0
	319		0
	2182		1
	634		1
	1794		0
	378		1
	671		0
	2016		0
	244		1
	484		0
	230		1
	476		1
	1287		0
	66		1
	1332		1
	691		1
	491		0
	525		0
	483		0
	532		1

## Sheet: F
	S2-CP8
	Control	PD184161	U0126			95.00% CI of diff.	Adjusted P Value
	0.940415	0.272547	0.527996		Control vs. PD184161	0.6660 to 0.8333	<0.0001
	1.03704	0.243763	0.567742		Control vs. U0126	0.3635 to 0.5308	<0.0001
	1.02255	0.234841	0.562888
	PANC-1
	Control	PD184161	U0126			95.00% CI of diff.	Adjusted P Value
	0.974858	0.498383	0.578178		Control vs. PD184161	0.4163 to 0.6143	<0.0001
	0.963163	0.442288	0.538436		Control vs. U0126	0.3329 to 0.5308	<0.0001
	1.06198	0.513325	0.587853

## Sheet: G
	S2-CP8
	Control	β-catenin		P value	0.0013
	0.915432	0.429379		95% confidence interval	0.3583 to 0.7314
	1.12979	0.472911
	0.954782	0.463153
	PANC-1
	Control	β-catenin		P value	<0.0001
	0.994589	0.349572		95% confidence interval	0.6139 to 0.6969
	1.02743	0.34629
	0.977978	0.33783

## Sheet: H
	S2-CP8
	Control	KRAS#1	KRAS#2			95.00% CI of diff.	Adjusted P Value
	0.891607	0.266481	0.428503		Control vs. KRAS#1	0.6091 to 0.8785	<0.0001
	1.0682	0.250401	0.44298		Control vs. KRAS#2	0.4231 to 0.6925	<0.0001
	1.04019	0.251642	0.455192
	PANC-1
	Control	KRAS#1	KRAS#2			95.00% CI of diff.	Adjusted P Value
	0.931715	0.148118	0.240241		Control vs. KRAS#1	0.4821 to 1.201	0.0009
	0.796534	0.167209	0.367186		Control vs. KRAS#2	0.3116 to 1.031	0.0029
	1.27175	0.160057	0.379376

## Sheet: I
	Control	KRAS	β-Catenin	KRAS+β-Catenin			95.00% CI of diff.	Adjusted P Value
	0.942179	0.302962	0.444354	0.0984421		KRAS vs. KRAS+β-Catenin	0.1144 to 0.3031	0.0003
	1.02224	0.330347	0.386325	0.0884709		β-Catenin vs. KRAS+β-Catenin	0.2268 to 0.4155	<0.0001
	1.03558	0.26822	0.408045	0.0883632
