# Supplementary material for: Localization of KRAS downstream target ARL4C to invasive pseudopods accelerates pancreatic cancer cell invasion
Source: eLife. 2021 Sep 30;10:e66721. doi: 10.7554/eLife.66721 (PMC8598236; doi:10.7554/eLife.66721)
Supplement: Figure 2—figure supplement 1—source data 1. [file elife-66721-fig2-figsupp1-data1.xlsx]

## Sheet: A
	Control	ARL4C		P value	0.8552
	4878	1955		95% confidence interval	-1240 to 1030
	5687	13779
	5509	5260
	6485	4488
	2957	3397
	4045	4201
	7901	5728
	5908	5574
	5812	3258
	7373	8471
	4892	6739
	3885	6819
	8071	6766
	10491	7148
	7115	8318
	16248	2045
	11137	5676
	4356	7385
	5480	2815
	10687	5179
	5112	5347
	5859	4021
	2965	2767
	6227	17024
	6027	5933
	6436	3788
	5900	4642
	2233	5831
	7018	21157
	6638	10108
	2676	3396
	4005	4811
	10384	4577
	5003	10578
	9573	8646
	8786	9119
	6191	9156
	4440	5734
	5331	2522
	6632	6398
	3700	5709
	17891	7758
	4638	7442
	4602	4670
	4235	2190
	14776	4452
	5290	7599
	8354	3463
	7148	5466
	4494	7311
	2792	11265
	3902	7189
	4636	6737
	7052	6510
	2881	3576
	5657	3999
	8410	11806
	7452	8399
	5346	2124
	7052	6965
	9786	10261
	6926	4935
	3812	6796
	5674	12314
	6366

## Sheet: C
	Control	ARL4C	Staurosporine			95.00% CI of diff.	Adjusted P Value
	0	10	88.8889		Control vs. ARL4C	-27.45 to 16.15	0.9419
	11.1111	16.6667	63.6364		Control vs. Staurosporine	-87.45 to -43.86	0.0002
	11.1111	12.5	66.6667

## Sheet: D
	Migration
	Control	ARL4C		P value	0.029
	102.893	92.9752		95% confidence interval	2.349 to 25.75
	95.4545	81.8182
	101.653	83.0578
	Invasion
	Control	ARL4C		P value	0.0002
	99.0431	31.2201		95% confidence interval	61.40 to 96.02
	94.0191	16.866
	106.938	15.7895

## Sheet: F
	WT	T27N	Q72L			95.00% CI of diff.	Adjusted P Value
	67.5676	0	65.7895		WT vs. T27N	53.49 to 76.99	<0.0001
	57.8947	0	76.3158		WT vs. Q72L	-17.95 to 5.552	0.3368
	70.2703	0	72.2222
