# Supplementary material for: Localization of KRAS downstream target ARL4C to invasive pseudopods accelerates pancreatic cancer cell invasion
Source: eLife. 2021 Sep 30;10:e66721. doi: 10.7554/eLife.66721 (PMC8598236; doi:10.7554/eLife.66721)
Supplement: Figure 2—figure supplement 2—source data 1. [file elife-66721-fig2-figsupp2-data1.xlsx]

## Sheet: C
	Cont ASO	ARL4C ASO		P value	0.0056
	55.814	50.8197		95% confidence interval	3.411 to 10.59
	60	51.5625
	59.0909	51.5152
	Control	ARL4C KO		P value	0.0022
	60	53.3333		95% confidence interval	5.169 to 11.97
	59.6774	50.7692
	59.322	49.1803

## Sheet: D
	Control		ARL4C KO
	number of pseudopods		number of pseudopods
	0	43.4211	0	45.8333
	1	40.1316	1	34.7222
	2	9.86842	2	11.8056
	>=3	6.57895	>=3	7.63889

## Sheet: E
	Control	ARPC2 #1	ARPC2 #2			95.00% CI of diff.	Adjusted P Value
	1	0.04411	0.029415		Control vs. ARPC2 #1	0.9156 to 1.029	<0.0001
	0.985622	0.042202	0.033986		Control vs. ARPC2 #2	0.9278 to 1.041	<0.0001
	1.06155	0.044351	0.03068

## Sheet: F
	Control	ARPC2 #1	ARPC2 #2			95.00% CI of diff.	Adjusted P Value
	58.6957	46.1538	38.2353		Control vs. ARPC2 #1	8.688 to 25.62	0.0019
	57.8947	38.2353	38.2353		Control vs. ARPC2 #2	10.80 to 27.73	0.001
	62.5	43.2432	44.8276

## Sheet: G
	Control		ARPC2 #1		ARPC2 #2
	number of pseudopods		number of pseudopods		number of pseudopods
	0	40.5172	0	57.2727	0	59.7938
	1	40.5172	1	28.1818	1	25.7732
	2	16.3793	2	11.8182	2	9.27835
	>=3	2.58621	>=3	2.72727	>=3	5.15464

## Sheet: I
	Cortactin		ARPC2		F-actin				95.00% CI of diff.	Adjusted P Value
	Control	ARL4C KO	Control	ARL4C KO	Control	ARL4C KO		Cortactin	-3543 to -743.4	0.0029
	17479.3	17237.4	8787.53	10334.6	2708.25	7760.58		ARPC2	-1167 to 159.9	0.1362
	17245.8	8780.21	3843.45	1511.22	5318.69	9386.13		F-actin	-6580 to -2130	0.0002
	9984.5	23584.3	7834.47	1936.63	7640.61	21474.2
	17461.1	12963.2	5126.89	2334.68	8070.28	10267.4
	27645.6	11782.7	1766.15	1290.49	11537.7	6168.31
	25245.7	8397.28	3640.69	1792.08	12797.9	4078.58
	13597	5185.82	1384.85	2699.69	15626.5	14423.3
	21032.5	5954.95	4873.28	3351	20454.5	22461.7
	15517	3532.53	5036.08	1859.25	18369.6	3726.56
	15486.4	11828	2692.57	8683.17	27213.6	14361
	10514.6	13478	4493.37	1949.49	13174.9	17539.3
	11561.2	5715.56	1220.85	3088.58	19752.9	13129.8
	16349.3	5235.97	2211.47	484.686	18743.3	4562.56
	7673.06	5107.31	6218.19	3912.61	7405.92	1763.44
	13137.9	10392.9	516.5	11872.8	22761.2	7361.03
	6118.72	6199.92	2720.65	4665.15	28889.8	7794.47
	8395.34	7190.34	5479.14	3466.06	24785	8228.95
	7450.31	13130.7	2194.75	2876.77	24667.2	10959.3
	12326.1	14946.5	5535.82	3159.81	19436.6	6617.28
	4969.61	11205.3	1550.05	6000.83	15221.1	12765.7
	12251.5	11418.9	2480.46	2080.33	8838.92	8672.53
	6398.74	21456.7	1194.49	1717.44	14238.1	28251.2
	18877.2	13942	7824.28	8115.92	35155.4	15330.1
	17521.4	3673.26	7119.67	3859.23	24112.6	2867.67
	7484.18	3840.58	7679	4268.53	6575.68	1360.61
	11623.5	12065.5	6509	2503.29	8961.11	17032.7
	5515.58	18073.1	3420.41	1840.33	8297.31	24340.5
	6115.08	6014.74	4387.4	5135.85	15665.6	6709.28
	5720.19	6630.78	1813.78	4098.95	12200.2	3871.11
	18220.5	12123	8510.15	356.278	38467.5	12411.9
	5206.69	6570.36	11141.2	1621.39	14317.2	15366.7
	5700.89	8150.44	10829.3	3113.49	11505	5754.17
	6634.58	14244.4	3104.82	2348.69	26390	4266.88
	7190.03	9470.95	6746.46	3238.92	13013.4	15116.5
	9836.44	16847.6	2653.14	4873.5	5718.61	8995.4
	6235	20880.7	2726	3152.41	7124.97	14182
	6933.18	10660.4	5877.69	2405.22	17340.8	7150.08
	11425.1	9425.21	6866.28	2001.1	34519.9	2591.5
	25083.8	2210.58	4441.95	2316.85	49573.7	3372.72
	10849.3	12099.5	303.615	3728.08	25069.3	18151.8
	5591.2	5789.39	2118.28	3197.25	11891.4	4397.86
	5966.39	7674.18	5992.42	7313.74	16097.3	19117.7
	13342.7	2923.89	8106.25	4817.29	34207.2	5695.05
	17662.6	10433.9	1498.54	2385.8	11075.2	26678.4
	18517.6	4841.31	3529.82	4386.53	21041.2	8485.89
	17762	3910.08	1912	5549.11	14198.7	12869.3
	2528.82	8573.33	966.564	5048.45	1932.38	6502.67
	4014.08	3902.95	2923.46	3563.61	6150.79	6426.37
	21662.5	8187.64	916.333	6585.18	32438.3	8590.36
	6546.61	5269.19	4621.87	2709.26	9400.14	9222.94
	10446	6895.61	3716.72	4564.95	13599.1	4283.12
	9873.14	10095.1	3942.63	478.667	26096.6	6955.74
	8802.75	3738.65	2993.37	6209.83	30800	5066.21
	16486.6	9252.13	2932.83	1371.51	28213.7	20074.3
	2494.51	5971.9	2616.97	3142	10718.7	7093.71
	5594.39	4312.13	1974.39	2185.31	11104.5	10176.4
	16017.5	4923.81	2126.75	12967.7	15918.6	9421.83
	15021.2	6840.92	581.436	5186.22	21863.2	19050.3
	10854.6	5711.15	3364.95	1775.34	21613.6	8211.36
	2253.05	6437.44	1487.83	3433.17	12274	8589.03
	17304.5	6625.72	2404.74	2010.13	24972.1	13548.7
	7844.66	12329.9	3698.17	3536.86	22774	12956
	9348.72	6733.53	4253.4	4667.84	9316.92	8195
	3692.19	11289.9	5111.84	2519.69	8766.92	10795
	6377.43	5045.18	3768.64	8318.49	8315.83	4120.66
	2403.03	7086.2	2010.47	3066.89	4744.95	4385.17
	3221.36	11486.1	4323.44	3892.85	11759.9	5499.89
	8737.46	16912	945.641	2372.47	17693.7	13776.1
	9411.03	1684.46	2785.64	1851.4	7796.72	6148.54
	6895.91	4277.26	3158.86	4002.69	25073.7	6364.66
	13808.5	3541.92	2853.81	6276.92	4113	2107.95
	17223	9530.5	2202.83	3243.46	18002.3	17139.4
	12386.3	6285.14	5237.69	2421.47	20164.1	8160.42
	7868.97	4880.42	5272.22	3116.83	27627.3	10168.4
	9493.56	6969.82	761.692	2936.95	10286.1	12173.8
	13930.7	11249.2	2325.09	3799.76	14273.3	25733.3
	14042.2	2851.47	4572.34	1835.23	15765.6	5484.74
	16813.4	4839.73	5620.47	4620.14	16010.3	3536.03
	11939.4	3126.53	1172.18	2137.53	18772.8	2131.03
	7439.44	7456.63	3865.42	499.744	9499.89	18215.7
	5149.28	7781.14	949.743	3737.42	7937.64	7979.11
	21084.6	2035.91	2902.74	9506.58	16446.3	583.943
	4182.38	12058.2	2166.72	4755.74	4950.38	26858
	9383	5704.08	2253.95	2712.97	5004.67	5796.61
	4020.74	8412.71	3532.39	1420.53	4537.89	10641.5
	1908.62	10793.7	7171.05	1871.34	1612.18	15265.1
	4750.97	8276.54	1243.06	1877.64	1914.94	7188.33
	3680.13	9236.92	11075.1	2586.81	2494.92	15417.2
	15067.3	8186.92	5313.92	1576.53	13607.6	16094.8
	12172.9	13948.5	9531.63	3014.9	15434.5	14716.8
	9243.72	14148	5515.26	1170.64	6173.49	21533.7
	2384.78	10266.9	1508.5	3309.08	5303.03	9579.26
	5044.42	5925.5	7790.56	3204.42	6996.67	6309.19
	6459.22	6155.72	3410.17	6871.36	2877.44	5613.94
	17383.1	3694.87	4576.72	1249.4	21204.7	5050.23
	10466.4	19478.4	4857.17	1701	8899.92	39912.1
	11893.9	8785.94	6299.11	1799.97	18524	13345.4
	6173.97	8539.11	2134.61	2898.83	5414.86	12755.9
	11050.3	4600.65	5756.47	2861.56	9741.81	7789.97
	11133.1	8280.64	4222.92	2495.25	15136.6	11591.3
	7067.67	5319.03	1381.89	2060.57	3462.06	13197.9
		7398.29	1528.78	7577.97		22848.2
		2179.06	2546.21	1671.03		8802.46
		7500.82	7970.4	5631.11		6367.61
		6110.89	8367.43	5073		12346.9
		5063	8185.87	12406.8		3842.26
			12662.2	2153.77
			4968.08	4010.09
				3387.03
				1668.51
				2439.2
				2973.63
				5150.28
				3070.9
				4413.05
