# Supplementary material for: Localization of KRAS downstream target ARL4C to invasive pseudopods accelerates pancreatic cancer cell invasion
Source: eLife. 2021 Sep 30;10:e66721. doi: 10.7554/eLife.66721 (PMC8598236; doi:10.7554/eLife.66721)
Supplement: Figure 2—figure supplement 3—source data 1. [file elife-66721-fig2-figsupp3-data1.xlsx]

## Sheet: B
	Control	ARL4C KO		P value	0.0018
	201.536	60.8467		95% confidence interval	-197.7 to -89.40
	227.509	46.298
	162.008	53.2909
