# Supplementary material for: Localization of KRAS downstream target ARL4C to invasive pseudopods accelerates pancreatic cancer cell invasion
Source: eLife. 2021 Sep 30;10:e66721. doi: 10.7554/eLife.66721 (PMC8598236; doi:10.7554/eLife.66721)
Supplement: Figure 2—source data 1. [file elife-66721-fig2-data1.xlsx]

## Sheet: A
	Control ASO	ARL4C ASO		P value	0.0178
	108.72	78.4743		95% confidence interval	10.94 to 65.90
	98.0929	57.2209
	93.1883	49.0465

## Sheet: B
	Control ASO	ARL4C ASO		P value	0.0024
	113.193	29.2876		95% confidence interval	42.11 to 99.85
	106.86	32.4538
	79.9473	25.3298

## Sheet: C
	GFP-Cont	GFP-ARL4C	ARL4C-GFP -Cont	ARL4C-GFP -ARL4C		GFP
	112.152	76.0041	107.246	101.812		P value	0.017
	92.9969	68.5891	102.536	80.7971		95% confidence interval	7.705 to 44.61
	94.8507	76.931	90.2174	99.6377
						ARL4C-GFP
						P value	0.5192
						95% confidence interval	-17.36 to 29.20

## Sheet: D
	GFP-Cont	GFP-ARL4C	ARL4C-GFP -Cont	ARL4C-GFP -ARL4C		GFP
	104.651	20.9302	97.8261	104.348		P value	<0.0001
	97.6744	27.907	97.8261	88.0435		95% confidence interval	65.29 to 83.55
	97.6744	27.907	104.348	81.5217
						ARL4C-GFP
						P value	0.2895
						95% confidence interval	-11.09 to 28.49

## Sheet: F
	Control ASO	ARL4C ASO		P value	0.0217
	205.878	94.5304		95% confidence interval	19.39 to 142.5
	210.059	106.302
	144.438	116.764

## Sheet: G
	2 mg/mL
	Control ASO	ARL4C ASO		P value	0.0053
	224.601	131.797		95% confidence interval	38.52 to 117.2
	222.206	122.596
	206.558	165.361
	1 mg/mL
	Control ASO	ARL4C ASO		P value	0.4575
	187.906	186.434		95% confidence interval	-22.16 to 12.04
	198.315	200.696
	188.659	202.929

## Sheet: H
	time	protrusion	cytoplasm
	0	7897.3	6013.85
	3	9458.29	5958.22
	6	6370.85	5707.4
	9	3798.16	5473.3
	12	4444.81	5312.12
	15	3856.31	5486.32
	18	8603.67	5238.85
	21	9820.99	5412.82
	24	6520.42	5177.33
	27	8518.71	5345.33
	30	6867.86	4999.96
	33	9593.33	5139.12
	36	16583.7	5001.32
	39	12624.7	5493.61
	42	11275.8	5916.16
	45	8013.69	6044.79
	48	9068.87	6349.16
	51	6944.27	6364.25
	54	6960.19	6137.04
	57	7391.85	5993.54
	60	6642.86	5333.33
	63	9194.07	6089.79
	66	8787.76	6401.84
	69	9221.3	6667.48
	72	12294	6531.16
	75	14265.2	6968.35
	78	11178.7	6682.67

## Sheet: I
	Angle(°)	Number of protrusions
	0~45	34
	46~90	11
	91~135	7
	136~180	7
	-1~-45	27
	-46~-90	8
	-91~-135	6
	-136~-179	5

## Sheet: K
	Control ASO	ARL4C ASO		P value	0.0147
	21.4286	16.6667		95% confidence interval	3.349 to 17.29
	28.5714	16.6667
	28.5714	14.2857
