# Supplementary material for: Localization of KRAS downstream target ARL4C to invasive pseudopods accelerates pancreatic cancer cell invasion
Source: eLife. 2021 Sep 30;10:e66721. doi: 10.7554/eLife.66721 (PMC8598236; doi:10.7554/eLife.66721)
Supplement: Figure 3—figure supplement 1—source data 1. [file elife-66721-fig3-figsupp1-data1.xlsx]

## Sheet: B
	Migration
	Control	CYTH2 #1	CYTH2 #2			95.00% CI of diff.	Adjusted P Value
	123.267	90.3955	109.399		Control vs. CYTH2 #1	-52.16 to 48.74	>0.9999
	63.6877	114.022	86.8002		Control vs. CYTH2 #2	-50.96 to 49.94	>0.9999
	112.994	100.668	105.29
	Invasion
	Control	CYTH2 #1	CYTH2 #2			95.00% CI of diff.	Adjusted P Value
	84.2246	111.497	82.6203		Control vs. CYTH2 #1	-81.11 to 50.62	>0.9999
	108.289	122.727	99.4652		Control vs. CYTH2 #2	-82.18 to 49.55	0.98
	107.487	111.497	166.845

## Sheet: E
	S2-CP8
	Control ASO	ARL4C ASO		P value	0.5387
	72	89.5833		95% confidence interval	-22.83 to 13.94
	76	82.9268
	79.5918	68.4211
	PANC-1
	Control ASO	ARL4C ASO		P value	0.8108
	87.7551	91.8919		95% confidence interval	-10.40 to 12.51
	97.6744	97.3684
	94.2308	87.234
