# Supplementary material for: Localization of KRAS downstream target ARL4C to invasive pseudopods accelerates pancreatic cancer cell invasion
Source: eLife. 2021 Sep 30;10:e66721. doi: 10.7554/eLife.66721 (PMC8598236; doi:10.7554/eLife.66721)
Supplement: Figure 3—figure supplement 2—source data 1. [file elife-66721-fig3-figsupp2-data1.xlsx]

## Sheet: D
	Migration
	Control	IQGAP1 #1	IQGAP1 #2			95.00% CI of diff.	Adjusted P Value
	134.211	56.5789	30.2632		Control vs. IQGAP1 #1	6.277 to 95.48	0.0295
	78.9474	50	32.8947		Control vs. IQGAP1 #2	19.43 to 108.6	0.0106
	86.8421	40.7895	44.7368
	Invasion
	Control	IQGAP1 #1	IQGAP1 #2			95.00% CI of diff.	Adjusted P Value
	109.594	25.4613	28.7823		Control vs. IQGAP1 #1	48.02 to 89.25	0.0001
	91.8819	32.1033	43.1734		Control vs. IQGAP1 #2	47.65 to 88.88	0.0001
	98.524	36.5314	23.2472

## Sheet: H
	Normal	Tumor		P value	<0.0001
	12.81	14.51		95% confidence interval	1.252 to 1.692
	11.64	13.31
	12.29	12.6
	12.06	13.23
	11.64	12.86
	12.42	13.09
	12.58	12.84
	11.99	13.98
	12.05	13.12
	12.41	13.42
	11.54	12.71
	11.45	12.53
	11.27	12.64
	11.74	13.05
	12.19	13.17
	11.6	12.99
	11.54	13.2
	11.46	13.23
	12.33	11.66
	11.53	13.57
	11.28	13.41
	11.63	13.25
	12.3	12.98
	12.82	13.3
	12.21	13.48
	12.25	13.45
	11.91	13.29
	12.12	13.38
	11.79	13.84
	11.89	13.37
	12.11	11.9
	12.42	13.3
	12.64	13.29
	12.47	13.59
	12.58	13.73
	11.62	14.87
	11.89	13.54
	12.01	13.2
	11.69	14.01
	12.47	13.55
	12.02	13.93
	12.65	13.41
	12.23	12.98
	11.84	13.38
	12.05	13.38
	12.51	13.82
	11.51	14.12
	12.03	13.38
	12.26	13.41
	11.93	13.92
	11.5	13.96
	12.06	13.43
	11.94	14.45
	12.07	14
	12.27	13.55
	12.44	13.32
	11.27	14.8
	12.12	13.6
	12.33	13.14
	12.36	12.8
	12.57	13.49
	12.14	14.54
	12.45	13.18
	12.25	13.33
	11.8	14.17
	12.17	13.63
	11.93	12.85
	12.4	13.03
	11.22	14.05
	11.92	13.3
	12	14.66
	12.01	13.06
	12.01	13.67
	11.8	13.05
	12.12	12.94
	11.5	13.91
	12.03	12.45
	12.22	13.21
	12.57	14.14
	11.85	13.67
	12.38	13.6
	12.31	13.84
	12.22	14.21
	11.59	13.3
	11.98	13.69
	12.43	13.48
	12.15	13.28
	11.97	14.27
	12.43	12.92
	12.06	13.23
	12.19	13.26
	12.6	13.64
	11.88	13.21
	11.67	12.99
	11.72	13.59
	12.79	14.24
	12.09	13.6
	11.73	13.54
	12	13.57
	11.46	13.72
	11.93	14.38
	12.24	13.06
	12.37	13.06
	11.93	13.4
	11.98	13.26
	11.83	13.24
	11.88	13.95
	11.63	13.73
	12.03	13.92
	12.23	14.14
	11.88	13.32
	12.4	12.98
	11.93	13.24
	11.34	13.05
	11.71	13.57
	12.2	13.56
	12.5	13.63
	12.12	13.27
	11.89	13.85
	11.73	13.61
	11.87	14.09
	11.65	12.75
	12.34	13.93
	12.11	13.61
	11.89	13.93
	12.08	14.27
	12.14	13.36
	11.82	13.21
	11.65	13.34
	12.22	13.61
	11.73	12.03
	12.35	12.63
	12.37	13.35
	12.37	13.37
	11.99	13.38
	12.03	13.36
	11.71	13.74
	12.3	12.76
	12.65	12.94
	12.17	13.81
	11.65	13.67
	11.98	13.47
	11.86	13.47
	12.02	13.63
	11.9	13.75
	12.69	13.78
	12.03	14.24
	12.32	12.73
	11.96	13.29
	12.35	13.55
	12	13.04
	12.13	13.89
	11.93	12.89
	11.95	13.36
	11.69	13.11
	12.49	13.15
	12.53	14.07
	12.52	13.4
	11.81	13.54
	11.94	12.43
	12.23	13.7
	12.31	13.54
	12.16	14
	12.08	14.84
	12.02	12.89
	0	12.44
	0	12.65
		12.49
		10.56
		13.78
		13.4
		13.45
		12.27
		12.1
		11.98
		11.41
		11.99
		12.84
		13.59

## Sheet: I
	Post operative date	High IQGAP1	Low IQGAP1	0; alive 1; death
	110	1
	467	1
	216	1
	1257	0
	144	1
	153	1
	460	1
	913	1
	1502	1
	598	1
	840	0
	545	1
	486	1
	969	0
	392	0
	366	1
	661	1
	592	1
	117	1
	666	1
	278	1
	593	1
	518	1
	145	1
	4	0
	123	1
	381	1
	120	1
	476	1
	1116	0
	308	1
	1854		0
	1383		0
	652		1
	2084		0
	998		0
	1942		0
	1794		0
	1103		0
	2741		0
	267		1
	252		0
	292		1
	498		1
	568		1
	1542		0
	511		1
	485		1
	706		0
	128		1
	295		0
	95		0
	31		1
	483		0
	8		0
	491		0
	395		0
	473		1
	482		0
	393		1
	1059		1
	2285		0
	416		0
	330		0
	2036		1
	379		0
	9		0
	366		1
	421		1
	228		0
	179		1
	732		1
	607		1
	584		0
	657		0
	388		0
	671		0
	634		1
	454		0
	338		0
	2182		1
	470		1
	350		0
	420		0
	225		0
	484		0
	41		1
	517		0
	463		0
	12		1
	183		1
	244		1
	716		0
	466		1
	525		0
	729		0
	232		0
	586		0
	1287		0
	660		0
	462		0
	375		1
	404		0
	230		1
	951		0
	920		0
	676		0
	334		1
	738		1
	430		1
	319		0
	353		1
	313		1
	720		0
	1323		0
	233		1
	481		1
	33		0
	289		0
	160		1
	603		0
	467		0
	250		1
	308		1
	532		1
	239		1
	286		0
	1021		0
	80		0
	293		1
	224		1
	143		1
	1037		0
	194		0
	695		1
	635		0
	1216		0
	969		0
	627		1
	287		0
	767		0
	431		0
	66		1
	378		1
	394		1
	236		1
	517		1
	498		0
	691		1
	2016		0
	365		1
	314		0
	123		1
	666		0
	737		0
	684		1
	596		1
	702		1
	219		1
	1130		1
	438		0
	440		0
	1332		1
	7		0
	743		0
	277		1
	299		1
	103		1
	245		0
	614		1
	522		0
	394		1
	458		1
	95		1

## Sheet: J
	Post operative date	High ARL4C and high IQGAP1	High ARL4C and low IQGAP1	0; alive 1; death
	185	1
	540	1
	156	1
	282	1
	1324	1
	1933	0
	793	1
	1280	1
	241	1
	450	1
	554	1
	346	1
	497	1
	842	1
	497	0
	240	0
	562	1
	516	0
	147	1
	251	1
	458	1
	671	1
	911	1
	1233	0
	975	0
	881	0
	504	1
	377		0
	813		0
	840		0
	667		1
	401		1
	162		1
	2114		0
	387		1
	155		1
	482		0
	178		1
	1205		0
	369		0
	1687		0
	516		1
	1062		1
	937		0
	838		0
	800		0
	699		0

## Sheet: K
	Post operative date	High ARL4C and High IQGAP1	High ARL4C and Low IQGAP1	Low ARL4C and High IQGAP1	Low ARL4C and Low IQGAP1	0; alive 1; death
	117	1
	145	1
	460	1
	614	1
	598	1
	1257	0
	299	1
	308	1
	123	1
	392	0
	592	1
	666	1
	110	1
	593	1
	216	1
	913	1
	144	1
	706	0
	1116	0
	969	0
	314	0
	486	1
	517	1
	596	1
	278	1
	467	1
	153	1
	236	1
	603	1
	120		1
	228		0
	388		0
	239		1
	738		1
	287		0
	233		1
	522		0
	498		1
	732		1
	225		0
	224		1
	743		0
	470		1
	33		0
	586		0
	951		0
	920		0
	350		0
	123		1
	676		0
	250		1
	4		0
	334		1
	365		1
	518		1
	219		1
	517		0
	293		1
	498		0
	267		1
	80		0
	716		0
	969		0
	430		1
	1323		0
	438		0
	95		0
	545		1
	252		0
	160		1
	720		0
	416		0
	1502		1
	603		0
	286		0
	338		0
	353		1
	95		1
	584		0
	627		1
	2036		1
	458		1
	695		1
	431		0
	379		0
	2285		0
	466		1
	194		0
	277		1
	308		1
	666		0
	420		0
	404		0
	1037		0
	440		0
	313		1
	1021		0
	366		1
	635		0
	394		1
	1130		1
	462		0
	183		1
	366		1
	31		1
	143		1
	128		1
	9		0
	463		0
	467		0
	607		1
	1059		1
	292		1
	245		0
	568		1
	394		1
	660		0
	729		0
	179		1
	1383		0
	473		1
	481		1
	767		0
	684		1
	395		0
	702		1
	657		0
	41		1
	421		1
	103		1
	232		0
	476			1
	381			1
	532				1
	483				0
	525				0
	491				0
	691				1
	1332				1
	66				1
	1287				0
	230				1
	484				0
	244				1
	2016				0
	671				0
	378				1
	1794				0
	634				1
	2182				1
	319				0
	737				0
	375				1
	8				0
	454				0
	652				1
	393				1
	1103				0
	1542				0
	7				0
	511				1
	330				0
	12				1
	840				0
	482				0
	295				0
	998				0
	2084				0
	2741				0
	1854				0
	1942				0
	661				1
	1216				0
	485				1
