# Supplementary material for: Localization of KRAS downstream target ARL4C to invasive pseudopods accelerates pancreatic cancer cell invasion
Source: eLife. 2021 Sep 30;10:e66721. doi: 10.7554/eLife.66721 (PMC8598236; doi:10.7554/eLife.66721)
Supplement: Figure 3—source data 1. [file elife-66721-fig3-data1.xlsx]

## Sheet: G
	GFP-Control	GFP-IQGAP1	GFP-IQGAP1 -Control	GFP-IQGAP1 -IQGAP1		GFP-Control vs. GFP-IQGAP1
	92.3263	67.609	87.5945	89.41		P value	0.0179
	92.811	71.4863	103.026	103.48		95% confidence interval	8.331 to 50.47
	1.48.6268	72.6979	109.38	104.387
						GFP-IQGAP1-Control vs. GFP-IQGAP1-IQGAP1
						P value	0.916
						95% confidence interval	-21.54 to 23.35

## Sheet: H
	GFP-Control	GFP-IQGAP1	GFP-IQGAP1 -Control	GFP-IQGAP1 -IQGAP1		GFP-Control vs. GFP-IQGAP1
	100	27.2727	126.562	79.6875		P value	0.0012
	84.0909	20.4546	84.375	79.6875		95% confidence interval	51.42 to 104.6
	115.909	18.1818	89.0625	65.625
						GFP-IQGAP1-Control vs. GFP-IQGAP1-IQGAP1
						P value	0.152
						95% confidence interval	-14.28 to 64.28

## Sheet: I
	Control	IQGAP1 KD	ARL4C KD	Double KD			95.00% CI of diff.	Adjusted P Value
	121.023	51.1364	30.6818	23.8636		IQGAP1 KD vs. Double KD	-11.02 to 50.79	0.3334
	92.0454	54.5455	28.9773	23.8636		ARL4C KD vs. Double KD	-28.63 to 33.18	>0.9999
	86.9318	35.7955	28.9773	34.0909

## Sheet: K
	Post operative time	High IQGAP1	Low IQGAP1	0; alive 1; death
	804	0
	185	1
	540	1
	156	1
	282	1
	1652	0
	1324	1
	1933	0
	793	1
	1280	1
	241	1
	450	1
	554	1
	346	1
	497	1
	842	1
	497	0
	240	0
	562	1
	516	0
	147	1
	251	1
	458	1
	671	1
	911	1
	1233	0
	844	1
	975	0
	881	0
	777	0
	504	1
	377		0
	813		0
	840		0
	667		1
	1555		0
	401		1
	2202		0
	368		1
	162		1
	2114		0
	387		1
	155		1
	482		0
	178		1
	1205		0
	369		0
	1687		0
	516		1
	1226		1
	1062		1
	1469		0
	830		0
	937		0
	838		0
	800		0
	699		0

## Sheet: L
	ARL4C-IQGAP1
		ARL4C	IQGAP1
	tcga-2j-aab1	10.5768	12.7987
	tcga-2j-aab4	11.0209	12.5562
	tcga-2j-aab6	11.7736	12.7096
	tcga-2j-aab8	11.7504	12.7069
	tcga-2j-aab9	11.5009	12.7545
	tcga-2j-aaba	11.1029	12.3732
	tcga-2j-aabe	11.9519	12.6081
	tcga-2j-aabf	10.5948	12.8373
	tcga-2j-aabh	10.5574	12.5685
	tcga-2j-aabi	11.7198	12.7533
	tcga-2j-aabk	10.4743	12.4866
	tcga-2j-aabo	11.2923	12.9342
	tcga-2j-aabp	11.1343	12.5002
	tcga-2j-aabr	11.6917	12.9054
	tcga-2j-aabt	10.2186	12.6176
	tcga-2j-aabu	11.3572	12.9937
	tcga-2j-aabv	9.86219	11.1033
	tcga-2l-aaqa	11.1842	12.7166
	tcga-2l-aaqe	10.7923	12.877
	tcga-2l-aaqi	10.6603	13.0064
	tcga-2l-aaqj	11.2389	12.813
	tcga-2l-aaql	11.084	11.7479
	tcga-2l-aaqm	10.949	10.7026
	tcga-3a-a9i5	10.2839	11.3246
	tcga-3a-a9i7	11.6918	12.6443
	tcga-3a-a9i9	10.2625	12.4311
	tcga-3a-a9ib	12.1876	12.7131
	tcga-3a-a9ic	12.3907	12.6154
	tcga-3a-a9ih	11.274	12.7043
	tcga-3a-a9ij	7.77596	9.85847
	tcga-3a-a9il	8.20149	11.5294
	tcga-3a-a9in	8.5695	11.1737
	tcga-3a-a9io	7.26329	11.2727
	tcga-3a-a9ir	9.78579	11.9932
	tcga-3a-a9is	8.61003	11.2542
	tcga-3a-a9iu	11.4657	13.0737
	tcga-3a-a9iv	9.8267	11.4306
	tcga-3a-a9ix	11.3257	12.7241
	tcga-3a-a9iz	11.8433	14.1473
	tcga-3a-a9j0	12.1599	12.9913
	tcga-3e-aaay	11.4146	12.253
	tcga-3e-aaaz	10.2316	12.4594
	tcga-f2-6879	11.8948	12.6124
	tcga-f2-6880	8.76318	12.0521
	tcga-f2-7273	11.7258	13.3734
	tcga-f2-7276	11.4017	13.161
	tcga-f2-a44g	12.2831	12.6542
	tcga-f2-a44h	12.0994	12.566
	tcga-f2-a7tx	11.5314	13.0867
	tcga-f2-a8yn	11.7768	12.4918
	tcga-fb-a4p5	10.9723	12.3681
	tcga-fb-a4p6	10.8703	12.7693
	tcga-fb-a545	12.2291	12.3725
	tcga-fb-a5vm	12.275	11.8368
	tcga-fb-a78t	10.0269	12.5722
	tcga-fb-a7dr	11.5487	12.6256
	tcga-fb-aapp	5.60547	12.0389
	tcga-fb-aapq	11.2324	12.9019
	tcga-fb-aaps	13.0021	12.3576
	tcga-fb-aapu	9.44704	13.789
	tcga-fb-aapy	11.0871	12.2357
	tcga-fb-aapz	11.7309	12.5399
	tcga-fb-aaq0	10.8886	12.1935
	tcga-fb-aaq1	11.9808	12.8558
	tcga-fb-aaq2	10.8589	13.191
	tcga-fb-aaq3	11.2019	12.1012
	tcga-fb-aaq6	10.3312	12.5323
	tcga-h6-8124	11.8066	13.3143
	tcga-h6-a45n	10.6876	12.3316
	tcga-h8-a6c1	10.3019	12.4237
	tcga-hv-a5a3	11.1675	12.0485
	tcga-hv-a5a4	10.6532	12.5605
	tcga-hv-a5a5	10.6368	12.6723
	tcga-hv-a5a6	11.4986	12.2798
	tcga-hv-a7ol	11.6278	11.7102
	tcga-hv-a7op	10.9345	11.7315
	tcga-hv-aa8v	12.0361	12.6007
	tcga-hv-aa8x	10.6236	12.6982
	tcga-hz-7289	6.84552	13.3472
	tcga-hz-7918	11.1627	13.2813
	tcga-hz-7919	11.4155	13.4734
	tcga-hz-7920	10.8322	12.8133
	tcga-hz-7922	11.901	13.6371
	tcga-hz-7923	11.1123	12.8452
	tcga-hz-7924	9.32002	13.2479
	tcga-hz-7925	12.1045	13.0328
	tcga-hz-7926	11.814	13.5043
	tcga-hz-8001	11.2683	12.0475
	tcga-hz-8002	11.2081	13.3365
	tcga-hz-8003	10.9616	12.8803
	tcga-hz-8005	13.4507	13.8086
	tcga-hz-8315	11.9275	12.9942
	tcga-hz-8317	10.297	12.8055
	tcga-hz-8519	9.8972	12.4395
	tcga-hz-8636	11.6463	13.2733
	tcga-hz-8637	11.0484	12.8223
	tcga-hz-8638	8.97148	12.9579
	tcga-hz-a49g	11.0268	12.57
	tcga-hz-a49h	10.5991	12.1782
	tcga-hz-a49i	11.3543	12.6966
	tcga-hz-a4bh	11.385	12.7307
	tcga-hz-a4bk	10.6962	12.3912
	tcga-hz-a77o	11.6185	12.6847
	tcga-hz-a77p	9.54335	12.2655
	tcga-hz-a77q	12.1236	12.6677
	tcga-hz-a8p0	10.3442	12.1811
	tcga-hz-a8p1	9.6188	12.9789
	tcga-hz-a9tj	11.5827	12.6857
	tcga-ib-7644	11.0381	13.0637
	tcga-ib-7645	11.5832	13.2386
	tcga-ib-7646	12.8659	13.5407
	tcga-ib-7647	11.5855	13.4089
	tcga-ib-7649	10.934	13.1349
	tcga-ib-7651	10.7264	13.1116
	tcga-ib-7652	11.2195	14.0024
	tcga-ib-7654	10.5229	13.9528
	tcga-ib-7885	11.9892	13.1688
	tcga-ib-7886	11.8341	13.6925
	tcga-ib-7887	11.5082	13.1129
	tcga-ib-7888	10.5772	12.9577
	tcga-ib-7889	10.8823	12.6637
	tcga-ib-7890	12.0578	13.2447
	tcga-ib-7891	11.3797	13.2315
	tcga-ib-7893	13.1752	13.4083
	tcga-ib-7897	11.0498	13.2778
	tcga-ib-8126	11.2186	12.5707
	tcga-ib-8127	12.278	13.0485
	tcga-ib-a5so	11.8732	12.8438
	tcga-ib-a5sp	9.13694	12.1984
	tcga-ib-a5sq	11.7885	12.889
	tcga-ib-a5ss	12.3825	13.2135
	tcga-ib-a5st	11.2425	12.7373
	tcga-ib-a6uf	11.352	12.8579
	tcga-ib-a6ug	10.6902	12.4872
	tcga-ib-a7lx	11.9082	12.6953
	tcga-ib-a7m4	10.622	12.1281
	tcga-ib-aaum	9.96992	12.1527
	tcga-ib-aaun	11.3294	13.1791
	tcga-ib-aauo	12.4884	12.7017
	tcga-ib-aaup	11.4399	12.7718
	tcga-ib-aauq	11.2087	12.5157
	tcga-ib-aaur	11.5579	12.4591
	tcga-ib-aaus	12.1919	12.4819
	tcga-ib-aaut	12.3203	12.7654
	tcga-ib-aauu	11.067	13.019
	tcga-ib-aauv	11.3355	12.575
	tcga-ib-aauw	10.5207	12.5805
	tcga-l1-a7w4	10.9383	13.4147
	tcga-lb-a7sx	9.83286	12.218
	tcga-lb-a8f3	11.4264	12.2946
	tcga-lb-a9q5	11.2745	12.6363
	tcga-m8-a5n4	11.5093	12.3833
	tcga-oe-a75w	11.7629	11.6277
	tcga-pz-a5re	12.1333	12.4597
	tcga-q3-a5qy	11.5864	12.264
	tcga-q3-aa2a	11.6518	12.085
	tcga-rb-a7b8	11.4004	12.5425
	tcga-rb-aa9m	11.5582	12.703
	tcga-rl-aaas	11.1451	12.3098
	tcga-s4-a8rm	10.0395	12.8733
	tcga-s4-a8ro	10.6173	12.5471
	tcga-s4-a8rp	10.7145	12.8806
	tcga-us-a774	11.4596	12.7314
	tcga-us-a776	6.6502	12.7397
	tcga-us-a779	9.54424	11.9955
	tcga-us-a77e	11.7033	12.6156
	tcga-us-a77g	9.49777	12.5064
	tcga-us-a77j	11.049	11.8786
	tcga-xd-aaug	11.3428	12.4788
	tcga-xd-aauh	10.7208	12.1932
	tcga-xd-aaui	11.2622	12.3149
	tcga-xd-aaul	11.7705	12.8291
	tcga-xn-a8t3	12.0879	12.6001
	tcga-xn-a8t5	11.5884	12.6376
	tcga-yb-a89d	12.0349	12.4766
	tcga-yh-a8sy	12.67	12.3939
	tcga-yy-a8lh	10.326	12.8412
	tcga-z5-aapl	11.1307	12.6887
