# Supplementary material for: Localization of KRAS downstream target ARL4C to invasive pseudopods accelerates pancreatic cancer cell invasion
Source: eLife. 2021 Sep 30;10:e66721. doi: 10.7554/eLife.66721 (PMC8598236; doi:10.7554/eLife.66721)
Supplement: Figure 4—figure supplement 1—source data 1. [file elife-66721-fig4-figsupp1-data1.xlsx]

## Sheet: B
	WT	G2A	ΔPBR	G2A-Cterm	ΔPBR-Cterm			95.00% CI of diff.	Adjusted P Value
	55.1724	43.2432	45.1613	55.5556	45.1613		WT vs. G2A	-7.368 to 14.10	0.7769
	44.8276	51.6129	55.1724	45.1613	47.0588		WT vs. ΔPBR	-10.21 to 11.26	0.9997
	53.3333	48.3871	51.4286	50	48.2759		WT vs. G2A-Cterm	-9.860 to 11.60	0.9975
							WT vs. ΔPBR-Cterm	-6.453 to 15.01	0.6213

## Sheet: C
	WT		G2A		ΔPBR		G2A-Cterm		ΔPBR-Cterm
	number of pseudopods		number of pseudopods		number of pseudopods		number of pseudopods		number of pseudopods
	0	48.8636	0	52.5253	0	49.4737	0	50	0	53.1915
	1	39.7727	1	39.3939	1	41.0526	1	37.5	1	38.2979
	2	11.3636	2	6.06061	2	9.47368	2	11.25	2	8.51064
	>=3	0	>=3	2.0202	>=3	0	>=3	1.25	>=3	0

## Sheet: D
	IQGAP1			P value	<0.0001
	Control	ARL4C KO		95% confidence interval	-3425 to -1959
	17141.9	1365.97
	2411.35	1153.5
	3171.67	2280.46
	2019.28	1990.62
	6145.85	2201.36
	5507.06	2395.74
	2062.6	4587.31
	2443.69	2257.86
	5198.11	2854.22
	1282.54	2566.3
	575.615	1871.5
	2984.51	6835.71
	6897.69	3005.05
	5346.79	8586.26
	3107.03	2280.23
	9674.9	3149.67
	2436.86	3158.44
	5577.67	1847.83
	1980.72	1924.16
	3100.77	3036.82
	1207.36	3534.08
	4160.58	1056.51
	5178.41	2999.19
	1839	1696.8
	2301.49	2515.03
	2472.29	2240.97
	4325.03	3210.05
	8812.47	1976.31
	3625.64	5223.61
	5418.06	3722.87
	13453.7	791.282
	10156	2165.91
	4496.97	1131.03
	5964.13	5484.61
	6441.41	830.838
	7563.31	6895.92
	4827.28	598.889
	3510.47	2096.49
	6460.87	960.692
	6877.89	2285.63
	7570.66	2553.14
	9684.97	1882.37
	5737.74	4033.85
	3533.85	2140.82
	8477.61	1332.71
	3684.89	3340.72
	1343.33	791.639
	9993.97	2203.89
	2677.5	3047.94
	6776.49	2615.86
	9941.17	4233.72
	14237.6	6617.56
	4286.76	1241.45
	1422.28	2348.78
	9635.79	3120.64
	2188.58	1722.95
	3381.69	3151.82
	4364.41	4210.28
	2033.58	3648.26
	2134.69	2589.06
	2598.24	2902.39
	3510.34	2008.08
	13562.4	4850
	1656.11	4548.12
	3235.08	3080.76
	4044.85	5850.4
	9700.25	3583.26
	4797.22	6357
	6158.11	4053.95
	5748.89	4011.05
	5644.31	3005.55
	6698.92	3237.67
	5780.55	4710.47
	10482.2	2222.33
	5305.4	1497.03
	4897.92	1724.89
	7827.22	4369.28
	16682.9	5254.26
	4124	1835.97
	9498.29	1915.26
	3817.61	3519.58
	9595.36	4473.5
	7586.44	2747.26
	6021.44	1574.87
	11094.4	2686.37
	12080.5	1679
	7969.75	5260.86
	10768.3	1748.08
	2256.95	2113.92
	4403.64	3097.26
	4208.17	2160.86
	9687.47	1400.47
	4082.5	1810.19
	3245.39	1823.72
	3891.39	2478.63
	9713.5	3894.83
	13867.7	1886.62
	2339.92	2978.28
	6051.36	1419.33
	2952.5	1573.59
	10161	1753.28
	5400.33	3570
	2500.08	4424.61
	2646.8	8994.14
	5029.73	2392.06
	6616.14	12396
	2003.63	1618.85
	5049.54	2974.69
	4336.46	843.949
		2133.83
		1300.72
		3288
		5809.78
		3802.68

## Sheet: F
	Control	IQGAP1 KO		P value	0.5736
	57.8947	59.4595		95% confidence interval	-5.331 to 8.345
	52.2727	53.3333
	53.6585	55.5556

## Sheet: G
	Control		IQGAP1 KO
	number of pseudopods		number of pseudopods
	0	45.5285	0	43.617
	1	44.7154	1	39.3617
	2	9.7561	2	13.8298
	>=3	0	>=3	3.19149

## Sheet: H
	Control ASO	ARL4C ASO		P value	0.0005
	22.2222	11.3208		95% confidence interval	7.054 to 12.16
	23.2558	14
	21.5686	12.9032
