# Supplementary material for: Localization of KRAS downstream target ARL4C to invasive pseudopods accelerates pancreatic cancer cell invasion
Source: eLife. 2021 Sep 30;10:e66721. doi: 10.7554/eLife.66721 (PMC8598236; doi:10.7554/eLife.66721)
Supplement: Figure 4—source data 1. [file elife-66721-fig4-data1.xlsx]

## Sheet: B
	WT	G2A	ΔPBR	G2A-Cterm	ΔPBR-Cterm			95.00% CI of diff.	Adjusted P Value
	69.4444	0	0	51.6129	56.5217		WT vs. G2A	48.48 to 85.79	<0.0001
	64.1026	0	0	63.6364	72.7273		WT vs. ΔPBR	50.86 to 88.18	<0.0001
	75	7.14286	0	75.7576	56		WT vs. G2A-Cterm	-12.81 to 24.51	>0.9999
							WT vs. ΔPBR-Cterm	-10.89 to 26.43	0.9389

## Sheet: E
	Control	Mock	WT	G2A	ΔPBR	G2A-Cterm	ΔPBR-Cterm			95.00% CI of diff.	Adjusted P Value
	22	5.12821	23.913	7.01754	1.81818	31.4286	12.1951		Control vs. Mock	13.18 to 25.85	<0.0001
	27.6596	8.95522	20	5.45455	8.33333	31.5789	13.2075		Control vs. WT	-2.827 to 9.849	0.6672
	29.7872	6.81818	25	4.87805	1.92308	33.3333	10.6061		Control vs. G2A	14.36 to 27.04	<0.0001
									Control vs. ΔPBR	16.12 to 28.80	<0.0001
									Control vs. G2A-Cterm	-11.97 to 0.7064	0.0983
									Control vs. ΔPBR-Cterm	8.142 to 20.82	<0.0001

## Sheet: F
	Control	IQGAP1 KO		P value	0.312
	51.2821	67.7419		95% confidence interval	-23.22 to 9.566
	70.5882	68.9655
	65.7895	71.4286

## Sheet: G
	GFP-Control	GFP-ARL4C	G2A-Control	G2A-ARL4C	ΔPBR-Control	ΔPBR-ARL4C	G2A-Cterm-Control	G2A-Cterm-ARL4C	ΔPBR-Cterm-Control	ΔPBR-Cterm-ARL4C		GFP-Control vs. GFP-ARL4C
	148.077	32.6923	102.61	16.0714	87.1324	26.4706	117.47	70.4819	82.6446	21.9008		P value	0.0438
	92.3077	17.3077	90.2473	12.7747	101.471	29.7794	93.9759	92.1687	115.289	21.4876		95% confidence interval	3.442 to 149.1
	59.6154	21.1538	107.143	11.1264	111.397	25.3676	88.5542	84.9398	102.066	23.9669
												G2A-Control vs. G2A-ARL4C
												P value	<0.0001
												95% confidence interval	72.09 to 101.3
												ΔPBR-Control vs. ΔPBR-ARL4C
												P value	0.0005
												95% confidence interval	52.90 to 92.69
												G2A-Cterm-Control vs. G2A-Cterm-ARL4C
												P value	0.1851
												95% confidence interval	-12.87 to 47.81
												ΔPBR-Cterm-Control vs. ΔPBR-Cterm-ARL4C
												P value	0.0012
												95% confidence interval	51.14 to 104.0
