# Supplementary material for: Localization of KRAS downstream target ARL4C to invasive pseudopods accelerates pancreatic cancer cell invasion
Source: eLife. 2021 Sep 30;10:e66721. doi: 10.7554/eLife.66721 (PMC8598236; doi:10.7554/eLife.66721)
Supplement: Figure 5—source data 1. [file elife-66721-fig5-data1.xlsx]

## Sheet: A
	PLCδPH	GRP1PH		P value	0.0012
	26.3158	51.7241		95% confidence interval	-32.44 to -15.95
	28.5714	51.7241
	21.4286	45.4545

## Sheet: B
	ARL4C
	Control	Rapamycin	LY294002			95.00% CI of diff.	Adjusted P Value
	75	65.2174	8.69565		Control vs. Rapamycin	-14.61 to 27.44	0.8
	69.5652	50	15		Control vs. LY294002	30.72 to 72.77	0.0007
	57.8947	68	23.5294
	IQGAP1
	Control	Rapamycin	LY294002			95.00% CI of diff.	Adjusted P Value
	37.5	56.5217	4.34783		Control vs. Rapamycin	-24.37 to 3.406	0.1326
	43.4783	43.4783	10		Control vs. LY294002	16.89 to 44.66	0.0012
	31.5789	44	5.88235

## Sheet: C
	Control	Rapamycin	LY294002			95.00% CI of diff.	Adjusted P Value
	90.8108	131.351	22.7027		Control vs. Rapamycin	-48.00 to 12.33	0.2594
	89.1892	107.027	19.4595		Control vs. LY294002	50.38 to 110.7	0.0004
	120	115.135	16.2162

## Sheet: F
	WT	G2A-PLCδPH	G2A-GRP1PH			95.00% CI of diff.	Adjusted P Value
	69.4444	18.1818	74.0741		WT vs. G2A-PLCδPH	26.31 to 60.65	0.0006
	64.1026	29.1667	57.1429		WT vs. G2A-GRP1PH	-14.12 to 20.22	>0.9999
	75	30.7692	68.1818

## Sheet: G
	Control	Mock	G2A-PLCδPH	G2A-GRP1PH			95.00% CI of diff.	Adjusted P Value
	22	5.12821	8.82353	22.2222		Control vs. Mock	12.76 to 26.27	<0.0001
	27.6596	8.95522	12.1212	17.0732		Control vs. G2A-PLCδPH	9.179 to 22.68	0.0003
	29.7872	6.81818	10.7143	21.2121		Control vs. G2A-GRP1PH	-0.4371 to 13.06	0.0674

## Sheet: H
	GFP-Control	GFP-ARL4C	G2APLCδ-Control	G2APLCδ-ARL4C	G2AGRP1-Control	G2AGRP1-ARL4C		GFP-Control vs GFP-ARL4C
	82.1705	13.1783	96.9466	36.6412	111	82		P value	0.0007
	107.752	15.5039	123.664	29.0076	116	103.5		95% confidence interval	62.01 to 112.7
	110.078	9.30233	79.3893	26.7176	73	69.5
								G2A-PLCδPH-Control vs G2A-PLCδPH-ARL4C
								P value	0.0064
								95% confidence interval	32.52 to 105.9
								G2A-GRP1PH-Control vs G2A-GRP1PH-ARL4C
								P value	0.4229
								95% confidence interval	-31.70 to 61.70
