# Supplementary material for: Localization of KRAS downstream target ARL4C to invasive pseudopods accelerates pancreatic cancer cell invasion
Source: eLife. 2021 Sep 30;10:e66721. doi: 10.7554/eLife.66721 (PMC8598236; doi:10.7554/eLife.66721)
Supplement: Figure 6—figure supplement 1—source data 1. [file elife-66721-fig6-figsupp1-data1.xlsx]

## Sheet: A
	ARL4C-MMP14				IQGAP1-MMP14
		ARL4C	MMP14			IQGAP1	MMP14
	tcga-2j-aab1	10.58	13.57		tcga-2j-aab1	12.8	13.57
	tcga-2j-aab4	11.02	13.55		tcga-2j-aab4	12.56	13.55
	tcga-2j-aab6	11.77	15.06		tcga-2j-aab6	12.71	15.06
	tcga-2j-aab8	11.75	14.48		tcga-2j-aab8	12.71	14.48
	tcga-2j-aab9	11.5	14.22		tcga-2j-aab9	12.75	14.22
	tcga-2j-aaba	11.1	13.79		tcga-2j-aaba	12.37	13.79
	tcga-2j-aabe	11.95	14.32		tcga-2j-aabe	12.61	14.32
	tcga-2j-aabf	10.59	13.59		tcga-2j-aabf	12.84	13.59
	tcga-2j-aabh	10.56	14.1		tcga-2j-aabh	12.57	14.1
	tcga-2j-aabi	11.72	14.32		tcga-2j-aabi	12.75	14.32
	tcga-2j-aabk	10.47	12.62		tcga-2j-aabk	12.49	12.62
	tcga-2j-aabo	11.29	15.38		tcga-2j-aabo	12.93	15.38
	tcga-2j-aabp	11.13	15.7		tcga-2j-aabp	12.5	15.7
	tcga-2j-aabr	11.69	13.83		tcga-2j-aabr	12.91	13.83
	tcga-2j-aabt	10.22	13.31		tcga-2j-aabt	12.62	13.31
	tcga-2j-aabu	11.36	14.59		tcga-2j-aabu	12.99	14.59
	tcga-2j-aabv	9.86	12.24		tcga-2j-aabv	11.1	12.24
	tcga-2l-aaqa	11.18	13.94		tcga-2l-aaqa	12.72	13.94
	tcga-2l-aaqe	10.79	14.2		tcga-2l-aaqe	12.88	14.2
	tcga-2l-aaqi	10.66	13.5		tcga-2l-aaqi	13.01	13.5
	tcga-2l-aaqj	11.24	14.22		tcga-2l-aaqj	12.81	14.22
	tcga-2l-aaql	11.08	13.99		tcga-2l-aaql	11.75	13.99
	tcga-2l-aaqm	10.95	11.5		tcga-2l-aaqm	10.7	11.5
	tcga-3a-a9i5	10.28	13.21		tcga-3a-a9i5	11.32	13.21
	tcga-3a-a9i7	11.69	15.18		tcga-3a-a9i7	12.64	15.18
	tcga-3a-a9i9	10.26	13.52		tcga-3a-a9i9	12.43	13.52
	tcga-3a-a9ib	12.19	15.23		tcga-3a-a9ib	12.71	15.23
	tcga-3a-a9ic	12.39	15.87		tcga-3a-a9ic	12.62	15.87
	tcga-3a-a9ih	11.27	14.03		tcga-3a-a9ih	12.7	14.03
	tcga-3a-a9ij	7.78	10.47		tcga-3a-a9ij	9.86	10.47
	tcga-3a-a9il	8.2	11.16		tcga-3a-a9il	11.53	11.16
	tcga-3a-a9in	8.57	11.51		tcga-3a-a9in	11.17	11.51
	tcga-3a-a9io	7.26	9.55		tcga-3a-a9io	11.27	9.55
	tcga-3a-a9ir	9.79	8.52		tcga-3a-a9ir	11.99	8.52
	tcga-3a-a9is	8.61	8.84		tcga-3a-a9is	11.25	8.84
	tcga-3a-a9iu	11.47	14.44		tcga-3a-a9iu	13.07	14.44
	tcga-3a-a9iv	9.83	11.86		tcga-3a-a9iv	11.43	11.86
	tcga-3a-a9ix	11.33	13.73		tcga-3a-a9ix	12.72	13.73
	tcga-3a-a9iz	11.84	13.91		tcga-3a-a9iz	14.15	13.91
	tcga-3a-a9j0	12.16	14.64		tcga-3a-a9j0	12.99	14.64
	tcga-3e-aaay	11.41	13.27		tcga-3e-aaay	12.25	13.27
	tcga-3e-aaaz	10.23	14.16		tcga-3e-aaaz	12.46	14.16
	tcga-f2-6879	11.89	13.52		tcga-f2-6879	12.61	13.52
	tcga-f2-6880	8.76	11.21		tcga-f2-6880	12.05	11.21
	tcga-f2-7273	11.73	13.68		tcga-f2-7273	13.37	13.68
	tcga-f2-7276	11.4	14.02		tcga-f2-7276	13.16	14.02
	tcga-f2-a44g	12.28	14.35		tcga-f2-a44g	12.65	14.35
	tcga-f2-a44h	12.1	14.64		tcga-f2-a44h	12.57	14.64
	tcga-f2-a7tx	11.53	14.01		tcga-f2-a7tx	13.09	14.01
	tcga-f2-a8yn	11.78	14.09		tcga-f2-a8yn	12.49	14.09
	tcga-fb-a4p5	10.97	13.6		tcga-fb-a4p5	12.37	13.6
	tcga-fb-a4p6	10.87	13.46		tcga-fb-a4p6	12.77	13.46
	tcga-fb-a545	12.23	15.1		tcga-fb-a545	12.37	15.1
	tcga-fb-a5vm	12.28	14.6		tcga-fb-a5vm	11.84	14.6
	tcga-fb-a78t	10.03	13.08		tcga-fb-a78t	12.57	13.08
	tcga-fb-a7dr	11.55	15.33		tcga-fb-a7dr	12.63	15.33
	tcga-fb-aapp	5.61	11.05		tcga-fb-aapp	12.04	11.05
	tcga-fb-aapq	11.23	13.71		tcga-fb-aapq	12.9	13.71
	tcga-fb-aaps	13	15.87		tcga-fb-aaps	12.36	15.87
	tcga-fb-aapu	9.45	12.89		tcga-fb-aapu	13.79	12.89
	tcga-fb-aapy	11.09	13.69		tcga-fb-aapy	12.24	13.69
	tcga-fb-aapz	11.73	13.76		tcga-fb-aapz	12.54	13.76
	tcga-fb-aaq0	10.89	13.37		tcga-fb-aaq0	12.19	13.37
	tcga-fb-aaq1	11.98	13.45		tcga-fb-aaq1	12.86	13.45
	tcga-fb-aaq2	10.86	14.11		tcga-fb-aaq2	13.19	14.11
	tcga-fb-aaq3	11.2	12.79		tcga-fb-aaq3	12.1	12.79
	tcga-fb-aaq6	10.33	13.11		tcga-fb-aaq6	12.53	13.11
	tcga-h6-8124	11.81	14.63		tcga-h6-8124	13.31	14.63
	tcga-h6-a45n	10.69	13.95		tcga-h6-a45n	12.33	13.95
	tcga-h8-a6c1	10.3	13.48		tcga-h8-a6c1	12.42	13.48
	tcga-hv-a5a3	11.17	14.41		tcga-hv-a5a3	12.05	14.41
	tcga-hv-a5a4	10.65	14.45		tcga-hv-a5a4	12.56	14.45
	tcga-hv-a5a5	10.64	13.83		tcga-hv-a5a5	12.67	13.83
	tcga-hv-a5a6	11.5	14.09		tcga-hv-a5a6	12.28	14.09
	tcga-hv-a7ol	11.63	14.13		tcga-hv-a7ol	11.71	14.13
	tcga-hv-a7op	10.93	9.98		tcga-hv-a7op	11.73	9.98
	tcga-hv-aa8v	12.04	15.38		tcga-hv-aa8v	12.6	15.38
	tcga-hv-aa8x	10.62	13.66		tcga-hv-aa8x	12.7	13.66
	tcga-hz-7289	6.85	13.47		tcga-hz-7289	13.35	13.47
	tcga-hz-7918	11.16	13.42		tcga-hz-7918	13.28	13.42
	tcga-hz-7919	11.42	13.84		tcga-hz-7919	13.47	13.84
	tcga-hz-7920	10.83	12.71		tcga-hz-7920	12.81	12.71
	tcga-hz-7922	11.9	14.87		tcga-hz-7922	13.64	14.87
	tcga-hz-7923	11.11	12.86		tcga-hz-7923	12.85	12.86
	tcga-hz-7924	9.32	12.49		tcga-hz-7924	13.25	12.49
	tcga-hz-7925	12.1	14.81		tcga-hz-7925	13.03	14.81
	tcga-hz-7926	11.81	13.75		tcga-hz-7926	13.5	13.75
	tcga-hz-8001	11.27	14.1		tcga-hz-8001	12.05	14.1
	tcga-hz-8002	11.21	13.49		tcga-hz-8002	13.34	13.49
	tcga-hz-8003	10.96	13.72		tcga-hz-8003	12.88	13.72
	tcga-hz-8005	13.45	15.41		tcga-hz-8005	13.81	15.41
	tcga-hz-8315	11.93	14.11		tcga-hz-8315	12.99	14.11
	tcga-hz-8317	10.3	13.61		tcga-hz-8317	12.81	13.61
	tcga-hz-8519	9.9	12.64		tcga-hz-8519	12.44	12.64
	tcga-hz-8636	11.65	14.3		tcga-hz-8636	13.27	14.3
	tcga-hz-8637	11.05	13.45		tcga-hz-8637	12.82	13.45
	tcga-hz-8638	8.97	12.79		tcga-hz-8638	12.96	12.79
	tcga-hz-a49g	11.03	13.63		tcga-hz-a49g	12.57	13.63
	tcga-hz-a49h	10.6	12.94		tcga-hz-a49h	12.18	12.94
	tcga-hz-a49i	11.35	13.72		tcga-hz-a49i	12.7	13.72
	tcga-hz-a4bh	11.38	14.24		tcga-hz-a4bh	12.73	14.24
	tcga-hz-a4bk	10.7	14.08		tcga-hz-a4bk	12.39	14.08
	tcga-hz-a77o	11.62	14.69		tcga-hz-a77o	12.68	14.69
	tcga-hz-a77p	9.54	13.4		tcga-hz-a77p	12.27	13.4
	tcga-hz-a77q	12.12	14.88		tcga-hz-a77q	12.67	14.88
	tcga-hz-a8p0	10.34	13.56		tcga-hz-a8p0	12.18	13.56
	tcga-hz-a8p1	9.62	12.72		tcga-hz-a8p1	12.98	12.72
	tcga-hz-a9tj	11.58	12.76		tcga-hz-a9tj	12.69	12.76
	tcga-ib-7644	11.04	14.05		tcga-ib-7644	13.06	14.05
	tcga-ib-7645	11.58	14.06		tcga-ib-7645	13.24	14.06
	tcga-ib-7646	12.87	14.27		tcga-ib-7646	13.54	14.27
	tcga-ib-7647	11.59	13.67		tcga-ib-7647	13.41	13.67
	tcga-ib-7649	10.93	13.26		tcga-ib-7649	13.13	13.26
	tcga-ib-7651	10.73	13.85		tcga-ib-7651	13.11	13.85
	tcga-ib-7652	11.22	13.26		tcga-ib-7652	14	13.26
	tcga-ib-7654	10.52	14.27		tcga-ib-7654	13.95	14.27
	tcga-ib-7885	11.99	15.03		tcga-ib-7885	13.17	15.03
	tcga-ib-7886	11.83	14.16		tcga-ib-7886	13.69	14.16
	tcga-ib-7887	11.51	14.71		tcga-ib-7887	13.11	14.71
	tcga-ib-7888	10.58	13.29		tcga-ib-7888	12.96	13.29
	tcga-ib-7889	10.88	13.48		tcga-ib-7889	12.66	13.48
	tcga-ib-7890	12.06	15.45		tcga-ib-7890	13.24	15.45
	tcga-ib-7891	11.38	13.73		tcga-ib-7891	13.23	13.73
	tcga-ib-7893	13.18	15.77		tcga-ib-7893	13.41	15.77
	tcga-ib-7897	11.05	12.82		tcga-ib-7897	13.28	12.82
	tcga-ib-8126	11.22	12.47		tcga-ib-8126	12.57	12.47
	tcga-ib-8127	12.28	14.17		tcga-ib-8127	13.05	14.17
	tcga-ib-a5so	11.87	14.11		tcga-ib-a5so	12.84	14.11
	tcga-ib-a5sp	9.14	12.81		tcga-ib-a5sp	12.2	12.81
	tcga-ib-a5sq	11.79	15.28		tcga-ib-a5sq	12.89	15.28
	tcga-ib-a5ss	12.38	15.47		tcga-ib-a5ss	13.21	15.47
	tcga-ib-a5st	11.24	14.02		tcga-ib-a5st	12.74	14.02
	tcga-ib-a6uf	11.35	13.32		tcga-ib-a6uf	12.86	13.32
	tcga-ib-a6ug	10.69	13.22		tcga-ib-a6ug	12.49	13.22
	tcga-ib-a7lx	11.91	14.46		tcga-ib-a7lx	12.7	14.46
	tcga-ib-a7m4	10.62	14.14		tcga-ib-a7m4	12.13	14.14
	tcga-ib-aaum	9.97	12.81		tcga-ib-aaum	12.15	12.81
	tcga-ib-aaun	11.33	14.25		tcga-ib-aaun	13.18	14.25
	tcga-ib-aauo	12.49	13.89		tcga-ib-aauo	12.7	13.89
	tcga-ib-aaup	11.44	14.38		tcga-ib-aaup	12.77	14.38
	tcga-ib-aauq	11.21	13.99		tcga-ib-aauq	12.52	13.99
	tcga-ib-aaur	11.56	14.01		tcga-ib-aaur	12.46	14.01
	tcga-ib-aaus	12.19	14.69		tcga-ib-aaus	12.48	14.69
	tcga-ib-aaut	12.32	14.07		tcga-ib-aaut	12.77	14.07
	tcga-ib-aauu	11.07	13.64		tcga-ib-aauu	13.02	13.64
	tcga-ib-aauv	11.34	14.37		tcga-ib-aauv	12.58	14.37
	tcga-ib-aauw	10.52	12.1		tcga-ib-aauw	12.58	12.1
	tcga-l1-a7w4	10.94	13.9		tcga-l1-a7w4	13.41	13.9
	tcga-lb-a7sx	9.83	12.19		tcga-lb-a7sx	12.22	12.19
	tcga-lb-a8f3	11.43	13.55		tcga-lb-a8f3	12.29	13.55
	tcga-lb-a9q5	11.27	13.73		tcga-lb-a9q5	12.64	13.73
	tcga-m8-a5n4	11.51	15.12		tcga-m8-a5n4	12.38	15.12
	tcga-oe-a75w	11.76	14.12		tcga-oe-a75w	11.63	14.12
	tcga-pz-a5re	12.13	14.49		tcga-pz-a5re	12.46	14.49
	tcga-q3-a5qy	11.59	13.82		tcga-q3-a5qy	12.26	13.82
	tcga-q3-aa2a	11.65	13.49		tcga-q3-aa2a	12.09	13.49
	tcga-rb-a7b8	11.4	14.37		tcga-rb-a7b8	12.54	14.37
	tcga-rb-aa9m	11.56	13.91		tcga-rb-aa9m	12.7	13.91
	tcga-rl-aaas	11.15	13.91		tcga-rl-aaas	12.31	13.91
	tcga-s4-a8rm	10.04	12.66		tcga-s4-a8rm	12.87	12.66
	tcga-s4-a8ro	10.62	13.88		tcga-s4-a8ro	12.55	13.88
	tcga-s4-a8rp	10.71	13.91		tcga-s4-a8rp	12.88	13.91
	tcga-us-a774	11.46	14.69		tcga-us-a774	12.73	14.69
	tcga-us-a776	6.65	12.94		tcga-us-a776	12.74	12.94
	tcga-us-a779	9.54	13.01		tcga-us-a779	12	13.01
	tcga-us-a77e	11.7	14.51		tcga-us-a77e	12.62	14.51
	tcga-us-a77g	9.5	12.02		tcga-us-a77g	12.51	12.02
	tcga-us-a77j	11.05	13.81		tcga-us-a77j	11.88	13.81
	tcga-xd-aaug	11.34	14.48		tcga-xd-aaug	12.48	14.48
	tcga-xd-aauh	10.72	13.19		tcga-xd-aauh	12.19	13.19
	tcga-xd-aaui	11.26	13.82		tcga-xd-aaui	12.31	13.82
	tcga-xd-aaul	11.77	14.82		tcga-xd-aaul	12.83	14.82
	tcga-xn-a8t3	12.09	14.77		tcga-xn-a8t3	12.6	14.77
	tcga-xn-a8t5	11.59	13.34		tcga-xn-a8t5	12.64	13.34
	tcga-yb-a89d	12.03	14.55		tcga-yb-a89d	12.48	14.55
	tcga-yh-a8sy	12.67	15.78		tcga-yh-a8sy	12.39	15.78
	tcga-yy-a8lh	10.33	13.27		tcga-yy-a8lh	12.84	13.27
	tcga-z5-aapl	11.13	12.42		tcga-z5-aapl	12.69	12.42

## Sheet: B
	Post operative date	High MMP14	Low MMP14	0; alive 1; death
	532	1
	666	1
	592	1
	1059	1
	1130	1
	596	1
	308	1
	913	1
	313	1
	1037	0
	518	1
	716	0
	607	1
	568	1
	416	0
	366	1
	438	0
	289	0
	593	1
	603	1
	525	0
	239	1
	278	1
	308	1
	286	0
	702	1
	9	0
	143	1
	421	1
	183	1
	292	1
	95	1
	338	0
	635	0
	216	1
	1021	0
	394	1
	1502	1
	287	0
	657	0
	2036	1
	517	0
	1287	0
	706	0
	365	1
	153	1
	299	1
	267	1
	252	0
	483	0
	2182	1
	123	1
	522	0
	684	1
	394	1
	627	1
	194	0
	144	1
	145	1
	476	1
	545	1
	969	0
	676	0
	233	1
	466	1
	404	0
	431	0
	128	1
	458	1
	232	0
	250	1
	80	0
	420	0
	470	1
	430	1
	350	0
	277	1
	498	1
	392	0
	586	0
	743	0
	695	1
	225	0
	160	1
	110	1
	951	0
	614	1
	498	0
	4	0
	33	0
	1257	0
	293	1
	732	1
	584	0
	1323	0
	224	1
	219	1
	353	1
	920	0
	440	0
	120	1
	598	1
	460	1
	463	0
	117	1
	388	0
	738	1
	228	0
	1542		0
	998		0
	1942		0
	1854		0
	485		1
	2741		0
	295		0
	1383		0
	2084		0
	1103		0
	12		1
	230		1
	393		1
	652		1
	467		0
	462		0
	840		0
	484		0
	454		0
	737		0
	236		1
	7		0
	603		0
	31		1
	8		0
	482		0
	486		1
	314		0
	381		1
	1216		0
	491		0
	511		1
	375		1
	244		1
	395		0
	1794		0
	41		1
	1116		0
	467		1
	2016		0
	2285		0
	1332		1
	319		0
	666		0
	720		0
	473		1
	330		0
	969		0
	517		1
	123		1
	767		0
	661		1
	481		1
	671		0
	95		0
	366		1
	103		1
	334		1
	634		1
	379		0
	729		0
	66		1
	691		1
	179		1
	378		1
	660		0

## Sheet: D
	Control ASO	ARL4C ASO		P value	0.0178
	25	9.09091		95% confidence interval	4.134 to 24.87
	32.2581	11.7647
	20	12.9032

## Sheet: F
	Control	MMP14 #1	MMP14 #2			95.00% CI of diff.	Adjusted P Value
	67.623	23.9754	12.9098		Control vs. MMP14 #1	40.48 to 121.8	0.0021
	116.803	19.6721	12.2951		Control vs. MMP14 #2	43.76 to 125.1	0.0017
	115.574	12.9098	21.5164

## Sheet: G
	WT-WT	WT-ΔC	ARL4C KO-WT	ARL4C KO-ΔC			95.00% CI of diff.	Adjusted P Value
	30.303	37.037	13.3333	23.0769		WT-WT vs. WT-ΔC	-9.621 to 4.155	>0.9999
	36.1111	34.2105	17.9487	21.4286		WT-WT vs. ARL4C KO-WT	9.257 to 23.03	0.0002
	31.25	34.6154	17.9487	25.5814		ARL4C KO-WT vs. ARL4C KO-ΔC	-13.84 to -0.06427	0.0477

## Sheet: H
	MMP14-Cont	MMP14-ARL4C	MMP14ΔC-Cont	MMP14ΔC-ARL4C		MMP14-Cont vs. MMP14-ARL4C
	25	18.75	33.3333	42.8571		P value	0.0172
	25	15	47.0588	35		95% confidence interval	1.932 to 11.28
	21.2121	17.6471	38.8889	33.3333
						MMP14ΔC-Cont vs. MMP14ΔC-ARL4C
						P value	0.6149
						95% confidence interval	-11.05 to 16.44
