# Supplementary material for: Localization of KRAS downstream target ARL4C to invasive pseudopods accelerates pancreatic cancer cell invasion
Source: eLife. 2021 Sep 30;10:e66721. doi: 10.7554/eLife.66721 (PMC8598236; doi:10.7554/eLife.66721)
Supplement: Figure 6—source data 1. [file elife-66721-fig6-data1.xlsx]

## Sheet: B
	Control	Mock	WT	G2A	ΔPBR	G2A-Cterm	ΔPBR-Cterm			95.00% CI of diff.	Adjusted P Value
	28.125	9.30233	44.4444	11.9048	4.87805	14.2857	6.89655		Control vs. Mock	8.951 to 29.12	0.0003
	31.9149	7.27273	42.1053	9.52381	4.54545	25.9259	3.125		Control vs. WT	-23.62 to -3.459	0.0062
	22.7273	9.09091	36.8421	6.38298	13.3333	16.129	3.84615		Control vs. G2A	8.236 to 28.40	0.0004
									Control vs. ΔPBR	9.920 to 30.09	0.0002
									Control vs. G2A-Cterm	-1.274 to 18.89	0.1075
									Control vs. ΔPBR-Cterm	12.88 to 33.05	<0.0001

## Sheet: C
	Control	Mock	FLAG-HA-IQGAP1			95.00% CI of diff.	Adjusted P Value
	15.1163	7.14286	28.5714		Control vs. Mock	0.9538 to 14.55	0.0295
	17.1429	8.33333	35.4839		Control vs. FLAG-HA-IQGAP1	-21.68 to -8.087	0.0013
	18.9655	12.5	31.8182

## Sheet: D
	Control	Rapamycin	LY294002			95.00% CI of diff.	Adjusted P Value
	18.9189	20.8333	5.40541		Control vs. Rapamycin	-3.102 to 11.25	0.2859
	18.75	13.3333	5.71429		Control vs. LY294002	8.686 to 23.03	0.0012
	23.5294	14.8148	2.5

## Sheet: E
		Control	ARL4C	IQGAP1	MMP14	ARL4C+MMP14	IQGAP1+MMP14			95.00% CI of diff.	Adjusted P Value
		100	55	35	50	55	65		ARL4C vs. ARL4C+MMP14	-28.41 to 21.74	>0.9999
		85	60	45	55	65	65		ARL4C vs. IQGAP1+MMP14	-33.41 to 16.74	>0.9999
		115	65	50	60	70	75		IQGAP1 vs. ARL4C+MMP14	-45.07 to 5.075	0.1961
									IQGAP1 vs. IQGAP1+MMP14	-50.07 to 0.07459	0.051
									MMP14 vs. ARL4C+MMP14	-33.41 to 16.74	>0.9999
									MMP14 vs. IQGAP1+MMP14	-38.41 to 11.74	>0.9999

## Sheet: F
	Control	ARL4C KD	IQGAP1 KD	MMP14 KD			95.00% CI of diff.	Adjusted P Value
	199.613	94.744	74.3228	55.5141		Control vs. ARL4C KD	53.83 to 127.4	0.0002
	200.621	117.497	69.9543	60.6803		Control vs. IQGAP1 KD	78.69 to 152.3	<0.0001
	167.43	83.5921	76.9625	83.6852		Control vs. MMP14 KD	85.81 to 159.4	<0.0001

## Sheet: G
	Control	ARL4C KD	IQGAP1 KD	MMP14 KD			95.00% CI of diff.	Adjusted P Value
	40	20	7.69231	14.2857		Control vs. ARL4C KD	2.114 to 22.67	0.0199
	33.3333	27.2727	14.2857	20		Control vs. IQGAP1 KD	14.62 to 35.17	0.0003
	33.3333	22.2222	10	9.09091		Control vs. MMP14 KD	10.82 to 31.37	0.0008

## Sheet: H
	MMP14-Cont	MMP14-ARL4C	MMP14ΔC-Cont	MMP14ΔC-ARL4C		MMP14-Cont vs MMP14-ARL4C
	124.395	57.3918	209.547	206.429		P value	0.0091
	116.84	89.0636	221.649	209.836		95% confidence interval	22.89 to 88.05
	124.056	52.4326	224.827	207.811
						MMP14ΔC-Cont vs MMP14ΔC-ARL4C
						P value	0.0889
						95% confidence interval	-2.564 to 23.86
