# Supplementary material for: Localization of KRAS downstream target ARL4C to invasive pseudopods accelerates pancreatic cancer cell invasion
Source: eLife. 2021 Sep 30;10:e66721. doi: 10.7554/eLife.66721 (PMC8598236; doi:10.7554/eLife.66721)
Supplement: Figure 7—figure supplement 1—source data 1. [file elife-66721-fig7-figsupp1-data1.xlsx]

## Sheet: A
	Days after transplantation	Control	ARL4C	0; alive 1; death
	33	1
	32	1
	50	1
	32	1
	24	1
	40	1
	36	1
	48	1
	38	1
	30		1
	56		1
	46		1
	61		1
	27		1
	40		1
	30		1
	35		1
	46		1
	83		1
	77		1
	278	1
	593	1
	518	1
	145	1
	4	0
	123	1
	381	1
	120	1
	476	1
	1116	0
	308	1
	1854		0
	1383		0
	652		1
	2084		0
	998		0
	1942		0
	1794		0
	1103		0
	2741		0
	267		1
	252		0
	292		1
	498		1
	568		1
	1542		0
	511		1
	485		1
	706		0
	128		1
	295		0
	95		0
	31		1
	483		0
	8		0
	491		0
	395		0
	473		1
	482		0
	393		1
	1059		1
	2285		0
	416		0
	330		0
	2036		1
	379		0
	9		0
	366		1
	421		1
	228		0
	179		1
	732		1
	607		1
	584		0
	657		0
	388		0
	671		0
	634		1
	454		0
	338		0
	2182		1
	470		1
	350		0
	420		0
	225		0
	484		0
	41		1
	517		0
	463		0
	12		1
	183		1
	244		1
	716		0
	466		1
	525		0
	729		0
	232		0
	586		0
	1287		0
	660		0
	462		0
	375		1
	404		0
	230		1
	951		0
	920		0
	676		0
	334		1
	738		1
	430		1
	319		0
	353		1
	313		1
	720		0
	1323		0
	233		1
	481		1
	33		0
	289		0
	160		1
	603		0
	467		0
	250		1
	308		1
	532		1
	239		1
	286		0
	1021		0
	80		0
	293		1
	224		1
	143		1
	1037		0
	194		0
	695		1
	635		0
	1216		0
	969		0
	627		1
	287		0
	767		0
	431		0
	66		1
	378		1
	394		1
	236		1
	517		1
	498		0
	691		1
	2016		0
	365		1
	314		0
	123		1
	666		0
	737		0
	684		1
	596		1
	702		1
	219		1
	1130		1
	438		0
	440		0
	1332		1
	7		0
	743		0
	277		1
	299		1
	103		1
	245		0
	614		1
	522		0
	394		1
	458		1
	95		1
