# Supplementary material for: Localization of KRAS downstream target ARL4C to invasive pseudopods accelerates pancreatic cancer cell invasion
Source: eLife. 2021 Sep 30;10:e66721. doi: 10.7554/eLife.66721 (PMC8598236; doi:10.7554/eLife.66721)
Supplement: Figure 7—source data 1. [file elife-66721-fig7-data1.xlsx]

## Sheet: B
	Weeks	1	2	3		Week 2
	Control	1	19.2428	359.342		P value	0.0387
		1	25.7636	375.647		95% confidence interval	0.9189 to 28.51
		1	21.8105	487.628
		1	6.95067	13.5528		Week 3
		1	19.4694	51.7437		P value	0.016
		1	50.7188	140.555		95% confidence interval	47.54 to 373.7
	ASO	1	18.8542	33.3169
		1	2.79834	43.5988
		1	6.18853	13.47
		1	3.46962	12.6085
		1	4.33993	0.990108
		1	8.25411	7.91629
		1	21.0375	80.2414

## Sheet: E
	Tumor weight
	Control	ARL4C		P value	0.5539
	2.4863	1.2668		95% confidence interval	-0.4558 to 0.8093
	2.3826	2.5134
	1.8801	2.5988
	1.4804	2.107
	2.2777	1.0281
	1.5813	1.4832
		1.445
		2.2614
	Number of metastatic mesenteric lymph nodes
	Control	ARL4C		P value	0.0203
	66	0		95% confidence interval	7.560 to 74.11
	25	23
	2	5
	57	0
	43	0
	115	3
		4
		49

## Sheet: H
	Control ASO	ARL4C ASO		P value	0.0169
	1	1.07271		95% confidence interval	-1.402 to -0.1747
	1.23954	1.21533
	1.57904	0.82171
	1.65818	0.410744
	2.35437	0.268755
	0.9372	0.249901

## Sheet: I
	Control ASO	ARL4C ASO		P value	0.0063
	2.87241	0.428385		95% confidence interval	-0.8189 to -0.1444
	1.15774	0.540737
	1.18157	0.70739
	0.920578	0.757406
	0.325071	1.07176
	0.599189	0.698016
	0.575487	0.466884
	1.26908	0.553994
	0.389416	0.3394
	0.415864	0.486368
	0.441575	0.480945
	1.75485	0.488846
	0.486502	0.464876
	2.64316	0.280211
	0.654834	0.555132
	0.489047	0.687839
	1.13336	0.405218
	0.61479	0.510941
	1.66553	0.462733
	0.945754	0.514959

## Sheet: J
	Control ASO	ARL4C ASO
	8	3		P value	0.0093
	3	0		95% confidence interval	0.5023 to 3.433
	3	0
	3	1
	2	0
	0	1
	2	0
	6	1
	2	0
	2	16
	1	0
	1	0
	1	0
	9	0
	4	0
	2	0
	1	0
	2	0
	13	0
	4	0
	0	0
	1	0
	0	0
	0	0
	1	0
	1	0
	3	0
	1	0
	3	0
	1	0
	3	0
