# Supplementary material for: Localization of KRAS downstream target ARL4C to invasive pseudopods accelerates pancreatic cancer cell invasion
Source: eLife. 2021 Sep 30;10:e66721. doi: 10.7554/eLife.66721 (PMC8598236; doi:10.7554/eLife.66721)
Supplement: Figure 7—source data 2. [file elife-66721-fig7-data2.xlsx]

## Sheet: Figure 7
Differentially expressed genes were identified from RNA-seq analysis (Figure 7K-M) based on the threshold below.
Log2(fold change) > 1.0 or Log2(fold change) < -1.0, and FDR < 0.1
Ensembl ID	log2 Fold Change	Adj.Pval	Symbol
ENSG00000154545	7.12508	0.000245	MAGED4
ENSG00000211772	6.35823	0.000816	TRBC2
ENSG00000116194	6.1683	0.0477	ANGPTL1
ENSG00000125931	6.02279	0.0157	CITED1
ENSG00000198610	5.57536	0.0143	AKR1C4
ENSG00000274252	5.55983	0.0809	GGTLC3
ENSG00000124701	5.4053	0.0986	APOBEC2
ENSG00000120055	5.37411	0.00591	C10orf95
ENSG00000102243	4.8893	0.0801	VGLL1
ENSG00000186081	4.54305	0.00591	KRT5
ENSG00000105989	4.22619	0.0308	WNT2
ENSG00000196610	3.99459	0.00137	HLA-DQB2
ENSG00000108244	3.68099	0.000131	KRT23
ENSG00000157570	3.65242	0.025	TSPAN18
ENSG00000101443	3.64064	0.012	WFDC2
ENSG00000101850	3.49941	0.0015	GPR143
ENSG00000101306	3.46148	0.0909	MYLK2
ENSG00000121898	3.32938	0.0559	CPXM2
ENSG00000125207	3.22376	0.0754	PIWIL1
ENSG00000129682	3.18531	0.017	FGF13
ENSG00000173868	3.14909	0.0858	PHOSPHO1
ENSG00000174600	3.09447	0.0017	CMKLR1
ENSG00000177494	2.97936	0.00124	ZBED2
ENSG00000145358	2.97436	0.052	DDIT4L
ENSG00000064270	2.96784	0.0387	ATP2C2
ENSG00000172818	2.90692	0.0976	OVOL1
ENSG00000087494	2.89911	0.00148	PTHLH
ENSG00000110375	2.80364	0.0172	UPK2
ENSG00000183742	2.79086	0.00499	MACC1
ENSG00000128591	2.78783	0.0735	FLNC
ENSG00000162069	2.76267	0.0586	BICDL2
ENSG00000145020	2.74312	0.0058	AMT
ENSG00000137699	2.70219	1.51e-05	TRIM29
ENSG00000133710	2.68077	3.97e-05	SPINK5
ENSG00000170498	2.66257	0.00833	KISS1
ENSG00000128510	2.64091	0.0864	CPA4
ENSG00000179178	2.64001	0.0021	TMEM125
ENSG00000146950	2.6396	0.0869	SHROOM2
ENSG00000135480	2.59926	0.00846	KRT7
ENSG00000183570	2.5634	0.0757	PCBP3
ENSG00000136155	2.54729	0.00171	SCEL
ENSG00000052344	2.52786	3.21e-06	PRSS8
ENSG00000179344	2.52126	0.00227	HLA-DQB1
ENSG00000068615	2.46235	0.0387	REEP1
ENSG00000154764	2.41762	2.51e-06	WNT7A
ENSG00000116701	2.40095	0.0976	NCF2
ENSG00000134198	2.29776	0.0982	TSPAN2
ENSG00000087495	2.28913	0.0171	PHACTR3
ENSG00000204444	2.20992	0.0015	APOM
ENSG00000253313	2.14436	0.0185	C1orf210
ENSG00000115363	2.10506	0.0109	EVA1A
ENSG00000129654	2.07836	0.0978	FOXJ1
ENSG00000124107	2.06161	0.0147	SLPI
ENSG00000165828	2.04387	0.0383	PRAP1
ENSG00000134757	2.04181	0.00132	DSG3
ENSG00000147676	2.02918	0.00669	MAL2
ENSG00000142273	2.02788	0.0289	CBLC
ENSG00000169903	1.96343	0.00971	TM4SF4
ENSG00000265190	1.9594	0.0018	ANXA8
ENSG00000107731	1.9313	0.0802	UNC5B
ENSG00000198729	1.91072	0.0697	PPP1R14C
ENSG00000091622	1.90738	0.0219	PITPNM3
ENSG00000062038	1.90159	0.0273	CDH3
ENSG00000053747	1.8873	9e-07	LAMA3
ENSG00000140832	1.7833	0.0017	MARVELD3
ENSG00000117595	1.71043	0.0172	IRF6
ENSG00000203499	1.70652	0.0909	IQANK1
ENSG00000173801	1.70255	2.11e-07	JUP
ENSG00000057657	1.69597	0.0736	PRDM1
ENSG00000118292	1.69071	0.0291	C1orf54
ENSG00000111799	1.68464	0.0452	COL12A1
ENSG00000123358	1.678	0.0153	NR4A1
ENSG00000143375	1.64295	0.000166	CGN
ENSG00000196408	1.64099	0.00655	NOXO1
ENSG00000181634	1.62867	0.0197	TNFSF15
ENSG00000198417	1.60115	0.000191	MT1F
ENSG00000189334	1.57425	0.00971	S100A14
ENSG00000125775	1.57082	0.0018	SDCBP2
ENSG00000151150	1.5628	0.00591	ANK3
ENSG00000088002	1.552	0.0264	SULT2B1
ENSG00000113070	1.55053	0.0015	HBEGF
ENSG00000131242	1.54853	0.00106	RAB11FIP4
ENSG00000177675	1.5265	0.0415	CD163L1
ENSG00000175040	1.52573	0.0182	CHST2
ENSG00000112559	1.51945	0.00106	MDFI
ENSG00000169239	1.51509	0.0017	CA5B
ENSG00000039068	1.50443	0.000835	CDH1
ENSG00000172137	1.50364	0.00288	CALB2
ENSG00000127831	1.46291	0.065	VIL1
ENSG00000085741	1.45679	0.0269	WNT11
ENSG00000164181	1.45468	0.00954	ELOVL7
ENSG00000114854	1.4267	0.065	TNNC1
ENSG00000154783	1.413	0.00971	FGD5
ENSG00000154263	1.3696	0.0522	ABCA10
ENSG00000138772	1.36598	0.00132	ANXA3
ENSG00000102890	1.36357	0.0625	ELMO3
ENSG00000281991	1.35837	0.00067	TMEM265
ENSG00000100321	1.35516	0.0394	SYNGR1
ENSG00000176658	1.35475	0.071	MYO1D
ENSG00000105357	1.34576	0.00682	MYH14
ENSG00000167767	1.34324	0.00334	KRT80
ENSG00000135925	1.29819	3.6e-05	WNT10A
ENSG00000181143	1.29678	0.0394	MUC16
ENSG00000250722	1.29087	0.0757	SELENOP
ENSG00000167757	1.28993	0.00324	KLK11
ENSG00000203780	1.28176	0.0511	FANK1
ENSG00000188536	1.28032	0.0179	HBA2
ENSG00000016402	1.27717	0.038	IL20RA
ENSG00000130940	1.26381	0.0384	CASZ1
ENSG00000173947	1.25661	0.0522	PIFO
ENSG00000154102	1.25206	0.0976	C16orf74
ENSG00000130707	1.25194	0.00279	ASS1
ENSG00000163817	1.24628	0.0492	SLC6A20
ENSG00000153234	1.24485	0.0802	NR4A2
ENSG00000196154	1.24371	0.0018	S100A4
ENSG00000117525	1.24348	0.00742	F3
ENSG00000120659	1.23782	0.0525	TNFSF11
ENSG00000176387	1.23347	0.0227	HSD11B2
ENSG00000205755	1.22743	0.0919	CRLF2
ENSG00000175591	1.20768	0.0308	P2RY2
ENSG00000125657	1.20048	0.00334	TNFSF9
ENSG00000124102	1.1974	0.065	PI3
ENSG00000189433	1.19275	0.0605	GJB4
ENSG00000124466	1.18447	0.032	LYPD3
ENSG00000182866	1.17969	0.0237	LCK
ENSG00000110042	1.17644	0.0518	DTX4
ENSG00000143369	1.1703	0.0859	ECM1
ENSG00000167608	1.15603	0.0997	TMC4
ENSG00000130545	1.14629	0.0143	CRB3
ENSG00000138131	1.13465	0.0705	LOXL4
ENSG00000117472	1.12431	0.0148	TSPAN1
ENSG00000063660	1.12125	0.00982	GPC1
ENSG00000129451	1.12085	0.0143	KLK10
ENSG00000183091	1.11087	1.15e-05	NEB
ENSG00000147689	1.11061	0.0404	FAM83A
ENSG00000156453	1.10653	0.00591	PCDH1
ENSG00000102934	1.10606	0.0111	PLLP
ENSG00000197635	1.10578	0.00763	DPP4
ENSG00000196878	1.10424	4.44e-06	LAMB3
ENSG00000168453	1.10274	0.00124	HR
ENSG00000147642	1.10181	0.0211	SYBU
ENSG00000164120	1.09354	0.000264	HPGD
ENSG00000233493	1.06838	0.0021	TMEM238
ENSG00000163683	1.06599	0.0166	SMIM14
ENSG00000163735	1.0597	0.00642	CXCL5
ENSG00000158825	1.04981	0.0171	CDA
ENSG00000149418	1.04086	0.00423	ST14
ENSG00000197822	1.03993	0.053	OCLN
ENSG00000136059	1.03181	0.0145	VILL
ENSG00000095932	1.02176	0.000835	SMIM24
ENSG00000099834	1.02124	0.065	CDHR5
ENSG00000102317	1.01816	0.0016	RBM3
ENSG00000150907	1.01576	0.00838	FOXO1
ENSG00000183087	1.00664	0.0681	GAS6
ENSG00000165140	1.00661	0.0123	FBP1
ENSG00000187193	1.00252	0.0344	MT1X
ENSG00000090382	1.00197	0.00121	LYZ
ENSG00000242076	-5.23311	0.0773	IGKV1-33
ENSG00000156127	-4.64043	0.000166	BATF
ENSG00000206301	-4.1757	5.09e-10	HLA-DQA2
ENSG00000196553	-3.60792	0.0697	CCDC196
ENSG00000043462	-3.00886	0.0705	LCP2
ENSG00000224389	-2.71792	0.0331	C4B
ENSG00000163661	-2.71267	0.00448	PTX3
ENSG00000204472	-2.68412	3.97e-05	AIF1
ENSG00000103175	-2.45987	0.0845	WFDC1
ENSG00000101336	-2.32536	0.0439	HCK
ENSG00000204632	-2.30402	3.66e-06	HLA-G
ENSG00000128284	-2.23322	0.036	APOL3
ENSG00000152128	-2.0754	0.00126	TMEM163
ENSG00000066336	-1.97687	0.00137	SPI1
ENSG00000089723	-1.82778	0.00588	OTUB2
ENSG00000112320	-1.7826	0.0199	SOBP
ENSG00000104324	-1.65532	0.00673	CPQ
ENSG00000128805	-1.644	0.0672	ARHGAP22
ENSG00000274810	-1.61712	0.0909	NPHP3-ACAD11
ENSG00000156587	-1.60058	0.0478	UBE2L6
ENSG00000157168	-1.59115	0.0638	NRG1
ENSG00000272636	-1.57094	0.0659	DOC2B
ENSG00000007038	-1.56302	0.0278	PRSS21
ENSG00000168785	-1.53407	0.00902	TSPAN5
ENSG00000143786	-1.50528	0.0107	CNIH3
ENSG00000112303	-1.49137	0.0387	VNN2
ENSG00000165376	-1.48371	0.000305	CLDN2
ENSG00000149557	-1.42633	0.000401	FEZ1
ENSG00000067798	-1.29959	0.065	NAV3
ENSG00000214290	-1.26817	0.0683	COLCA2
ENSG00000186470	-1.26411	0.0199	BTN3A2
ENSG00000156140	-1.25909	0.0996	ADAMTS3
ENSG00000163485	-1.2381	0.0146	ADORA1
ENSG00000182578	-1.22091	0.0976	CSF1R
ENSG00000068024	-1.15631	0.0289	HDAC4
ENSG00000188761	-1.14303	0.0387	BCL2L15
ENSG00000175538	-1.14011	0.00678	KCNE3
ENSG00000204397	-1.12342	0.000191	CARD16
ENSG00000159167	-1.10517	0.0837	STC1
ENSG00000100344	-1.09422	0.0233	PNPLA3
ENSG00000198734	-1.07107	0.0166	F5
ENSG00000108984	-1.05242	0.00755	MAP2K6
ENSG00000101194	-1.03634	0.00626	SLC17A9
ENSG00000239836	-1.02128	0.00564	PSMB9
ENSG00000136490	-1.01826	0.0606	LIMD2
ENSG00000138030	-1.01674	0.0845	KHK
