# Supplementary material for: Localization of KRAS downstream target ARL4C to invasive pseudopods accelerates pancreatic cancer cell invasion
Source: eLife. 2021 Sep 30;10:e66721. doi: 10.7554/eLife.66721 (PMC8598236; doi:10.7554/eLife.66721)
Supplement: Source data 1. [file elife-66721-supp2.xlsx]

## Sheet: Supplementary file 1 Table 1
Sex	Age	Tumor location	pStage	pT	pN	ly	v	ne	ARL4C positivity(%)	IQGAP1 positivity(%)
M	67	Head	IIA	3	0	1	1	2	40	60
M	64	Head	IIA	3	0	1	0	0	0	90
M	72	Head	IIB	3	1	1	0	2	100	80
F	69	Head	IIB	3	1	1	0	1	90	45
F	80	Head	IIA	3	0	1	0	1	100	1
M	63	Head	IIB	3	1	1	0	2	100	4
M	79	Body/Tail	IIA	3	0	2	0	1	100	30
F	72	Head	IIA	3	0	1	1	2	100	0
M	82	Head	IIB	3	1	2	2	2	100	70
M	47	Head	IIB	3	1	2	2	2	80	70
M	74	Body/Tail	IIB	3	1	2	0	2	50	90
M	70	Body/Tail	IB	2	0	0	0	1	0	0
F	51	Body/Tail	IA	1	0	1	0	1	0	50
F	83	Body/Tail	IB	2	0	0	0	1	100	90
F	67	Head	IIB	3	1	2	1	2	100	3
F	71	Body/Tail	IA	1	0	0	0	0	100	80
M	75	Head	IIB	3	1	1	1	2	90	100
M	48	Body/Tail	IIA	3	0	1	1	2	100	80
M	66	Head	IIB	3	1	2	2	2	0	0
M	66	Head	IIB	3	1	2	2	2	100	2
F	74	Head	IIB	3	1	2	0	1	100	90
M	68	Head	IIA	3	0	0	0	2	35	100
F	58	Body/Tail	IIA	3	0	1	0	2	20	100
M	52	Body/Tail	IIA	3	0	2	2	2	90	20
F	70	Head	IB	2	0	2	0	1	100	40
M	59	Head	IIA	3	0	1	0	1	30	50
F	67	Head	IIB	3	1	1	2	1	10	80
F	70	Head	IIB	3	1	1	0	1	35	80
F	57	Head	IIB	2	1	0	0	1	50	25
F	83	Head	IIA	3	0	0	0	2	80	2
F	63	Head	IIB	3	1	1	0	3	100	20
F	71	Head	IB	2	0	1	1	1	100	90
F	62	Head	IIA	3	0	2	0	1	100	75
F	67	Head	IIB	3	1	2	0	2	95	70
M	77	Head	IIA	3	0	2	2	2	100	50
F	77	Head	IIB	3	1	2	1	2	50	0
M	59	Head	IIA	3	0	2	1	1	100	0
M	76	Head	IIB	3	1	2	1	2	100	50
M	58	Body/Tail	IIB	3	1	2	1	1	100	0
M	81	Head	III	3	1	1	2	2	95	45
F	71	Body/Tail	IIA	3	0	0	0	0	90	35
M	68	Body/Tail	III	3	1	1	0	3	95	0
M	56	Head	IIA	3	0	0	1	2	2	3
F	67	Body/Tail	IIB	3	1	0	2	2	30	1
F	87	Body/Tail	IIB	3	1	0	0	1	15	0
F	71	Head	IIB	3	1	1	3	2	50	45
M	84	Head	IIB	3	1	0	1	3	75	80
F	50	Head	III	3	1	1	1	3	15	50
M	80	Body/Tail	IIA	3	0	0	0	0	0	5
M	60	Head	IIA	3	0	0	0	1	50	75
F	73	Body/Tail	IA	1	0	0	0	1	100	0
M	68	Body/Tail	IIB	3	1	0	0	1	100	80
F	75	Head	IA	1	0	0	0	0	0	90
M	86	Body/Tail	IIB	3	1	0	0	1	70	2
F	84	Body/Tail	III	3	1	0	0	2	50	45
M	69	Head	III	3	1	1	0	1	60	5
M	73	Head	III	3	1	1	0	1	100	7.5
