# Supplementary material for: Localization of KRAS downstream target ARL4C to invasive pseudopods accelerates pancreatic cancer cell invasion
Source: eLife. 2021 Sep 30;10:e66721. doi: 10.7554/eLife.66721 (PMC8598236; doi:10.7554/eLife.66721)
Supplement: Source data 2. [file elife-66721-supp3.xlsx]

## Sheet: Supplementary File 1 Table 2
						Number of identified peptides of each band
	Identified Proteins	Organism name	Gene name	Accession Number	Molecular Weight	Band 01	Band 02	Band 03	Band 04	Band 05	Band 06
	Nucleolin	Homo Sapiens	NCL	P19338	77 kDa	0	0	0	0	0	8
	ATP-dependent RNA helicase A	Homo Sapiens	DHX9	Q08211	141 kDa	0	0	0	7	0	0
	Filamin-A	Homo Sapiens	FLNA	P21333 (+1)	281 kDa	0	0	0	0	0	0
	Poly [ADP-ribose] polymerase 1	Homo Sapiens	PARP1	P09874	113 kDa	0	0	0	0	5	0
	Matrin-3	Homo Sapiens	MATR3	A0A0R4J2E8 (+3)	95 kDa	0	0	0	0	4	0
	Heterogeneous nuclear ribonucleoprotein U	Homo Sapiens	HNRNPU	Q00839	91 kDa	0	0	0	0	3	0
	DNA-dependent protein kinase catalytic subunit	Homo Sapiens	PRKDC	P78527	469 kDa	2	0	0	0	0	0
	Ras GTPase-activating-like protein IQGAP1	Homo Sapiens	IQGAP1	P46940	189 kDa	0	2	0	0	0	0
	Isoleucine--tRNA ligase, cytoplasmic	Homo Sapiens	IARS	A0A0A0MSX9 (+2)	142 kDa	0	0	2	0	0	0
	Structural maintenance of chromosomes protein 3	Homo Sapiens	SMC3	Q9UQE7	142 kDa	0	0	0	2	0	0
	Probability Legend
