# Supplementary figures and images for: Localization of KRAS downstream target ARL4C to invasive pseudopods accelerates pancreatic cancer cell invasion
Source: eLife journal article supplement (doi:10.7554/elife.66721), 2021-09-30

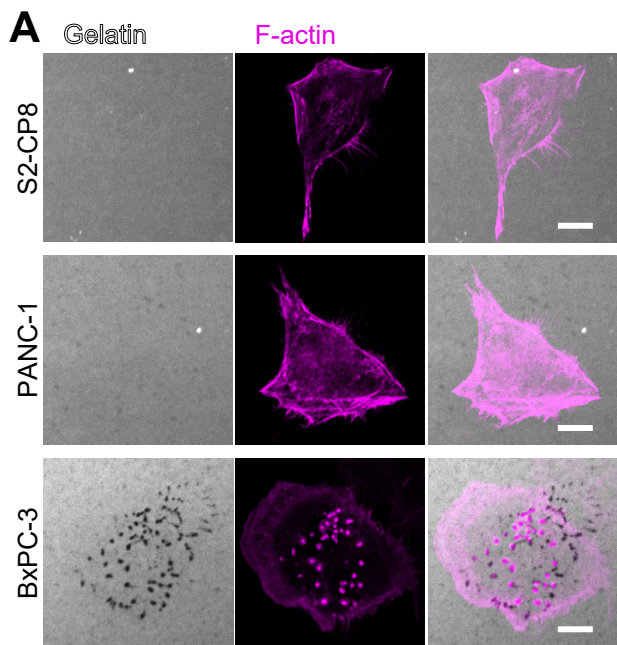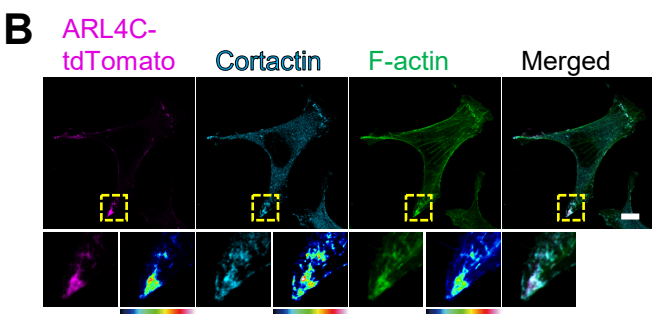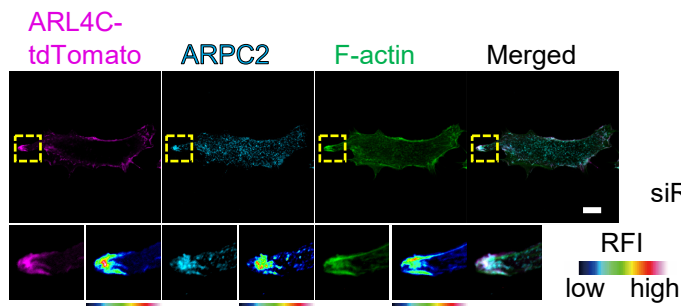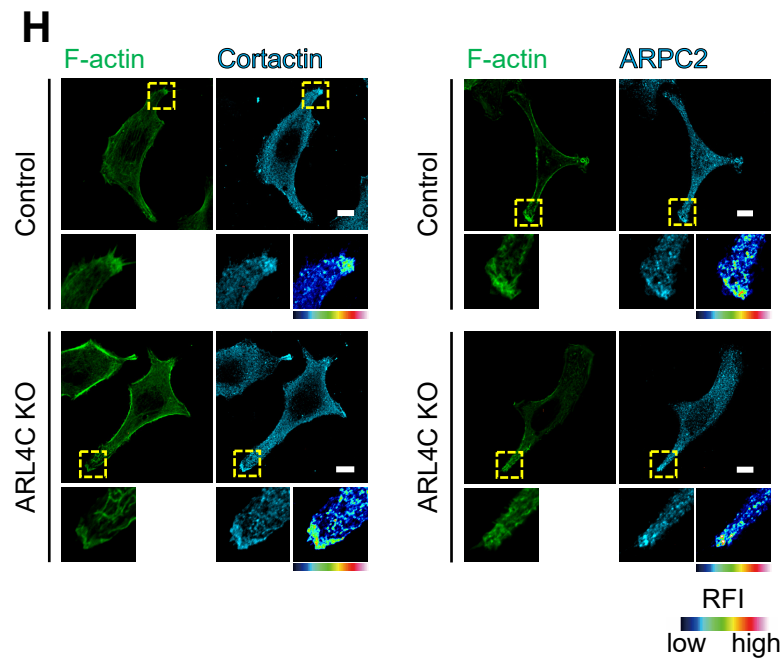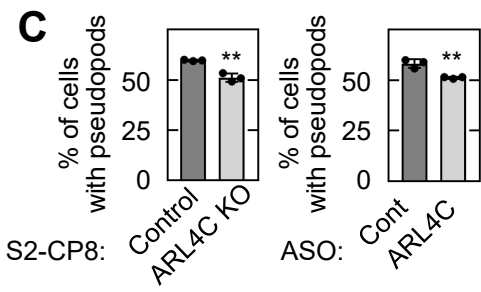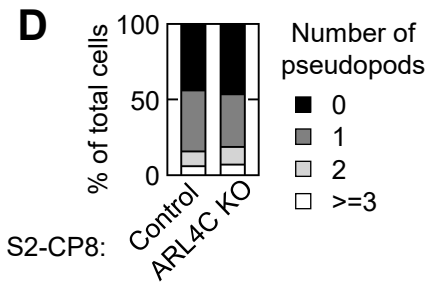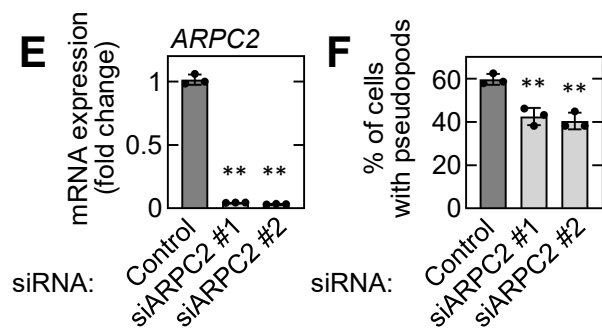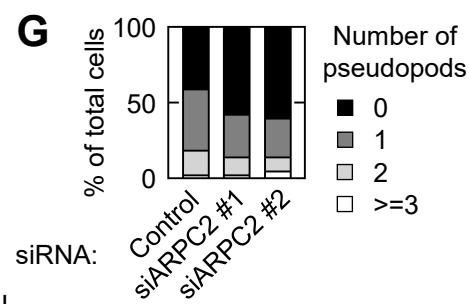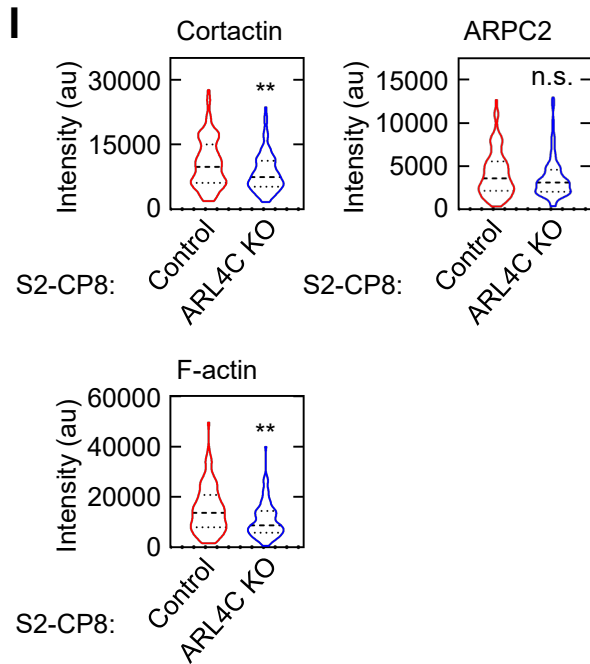

Supplement: supp [file elife-66721-supp-v1.zip]

# FLAG-Cytohesin2

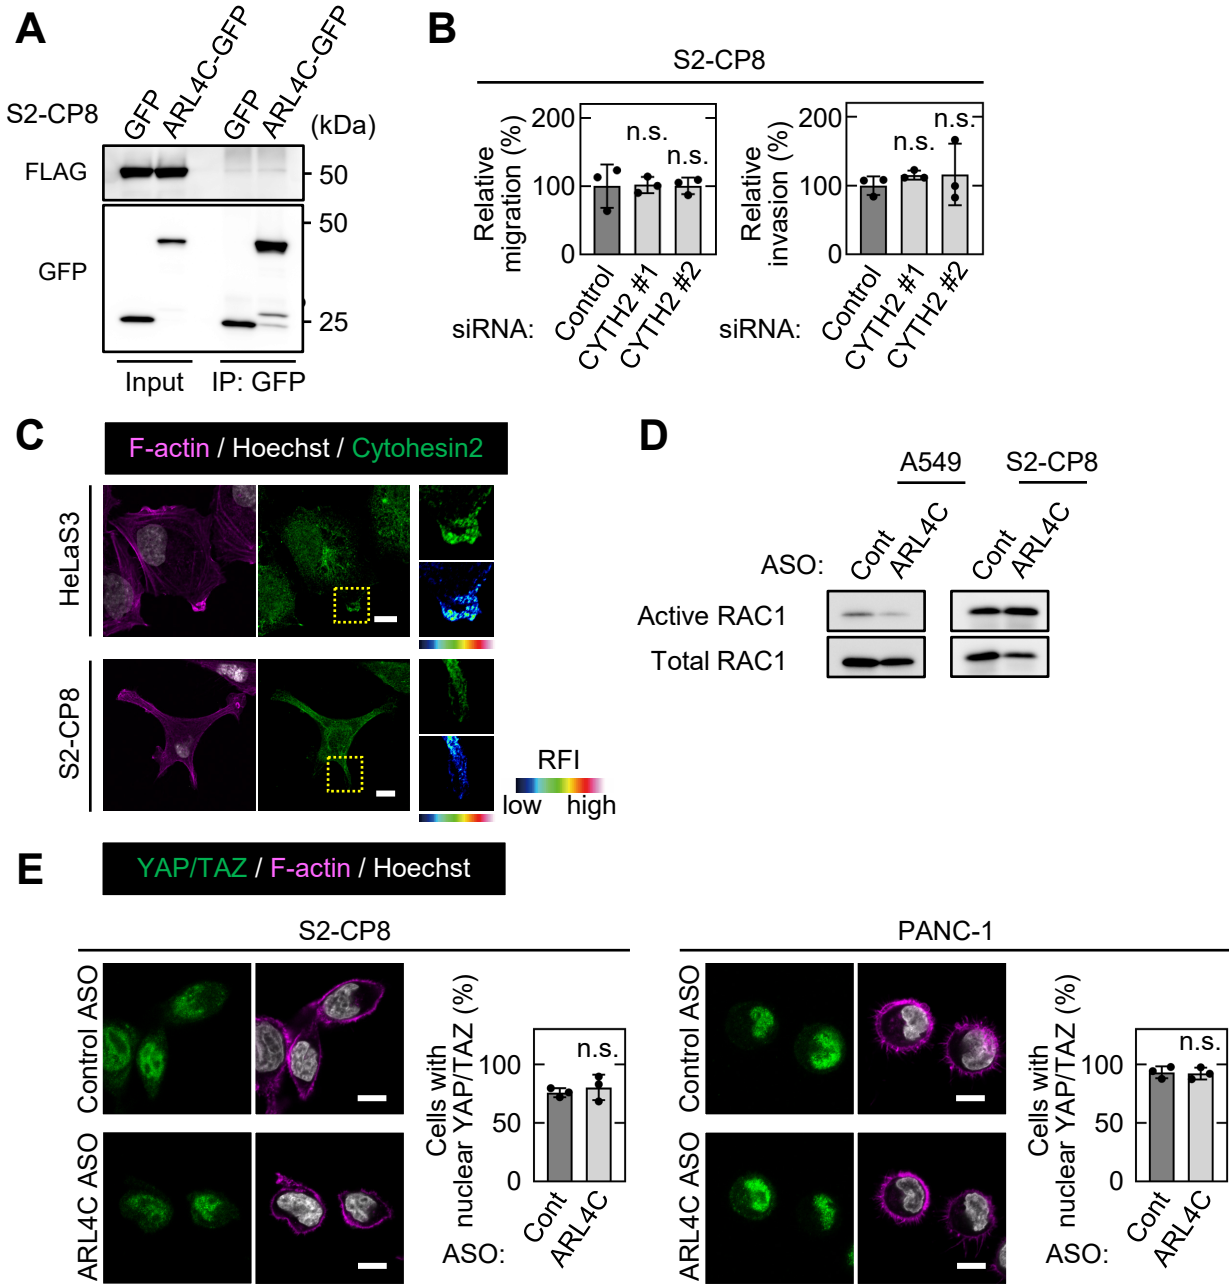

Supplement: supp [file elife-66721-supp-v1.zip]

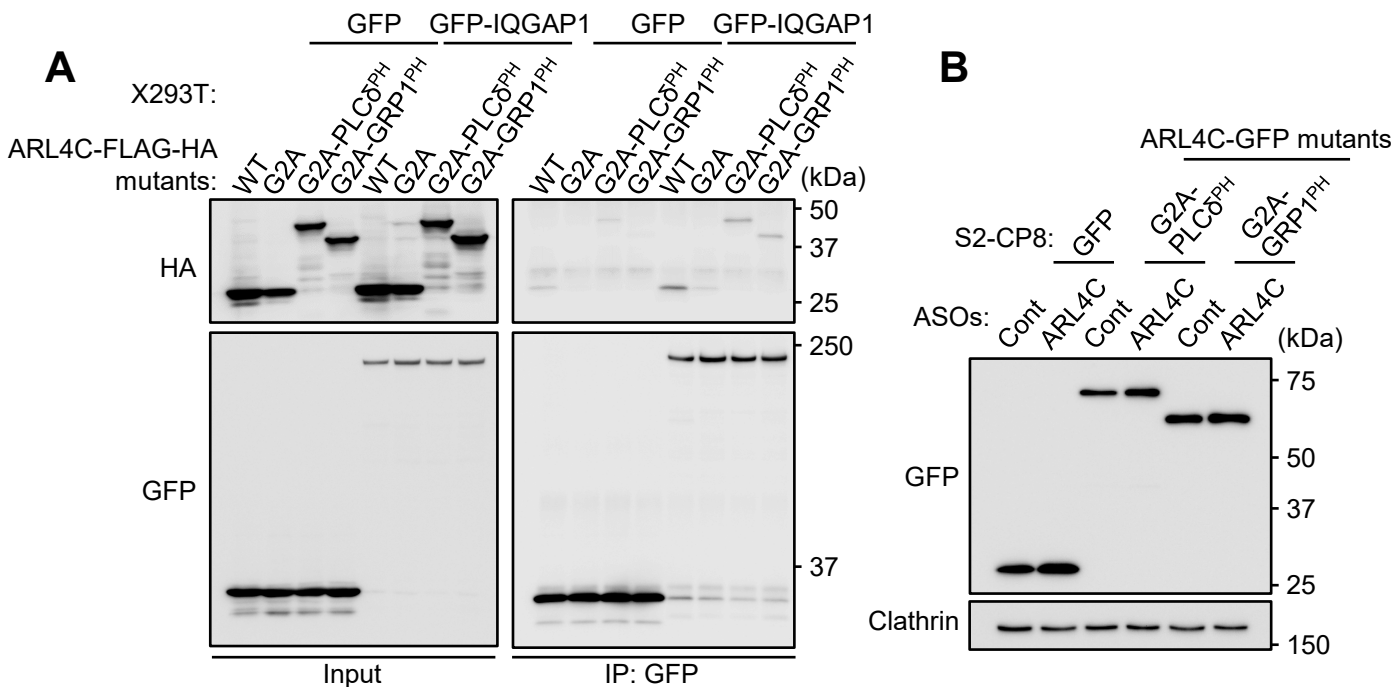

Supplement: supp [file elife-66721-supp-v1.zip]

**A**

ARL4C-GFP mutants

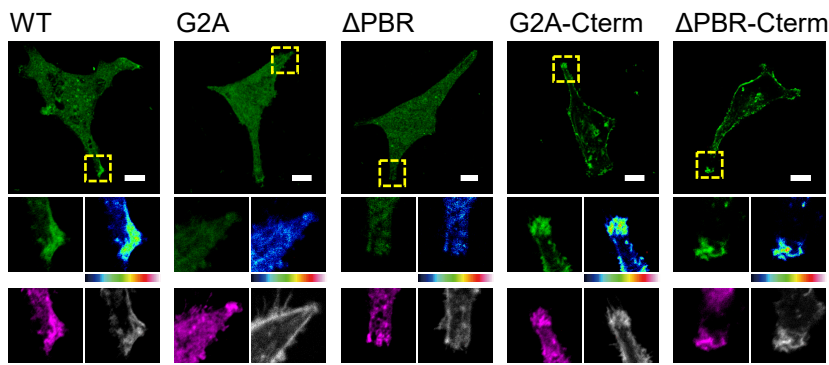

Cortactin F-actin

RFI  
low high**B**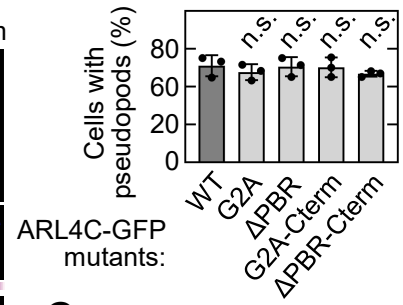**C**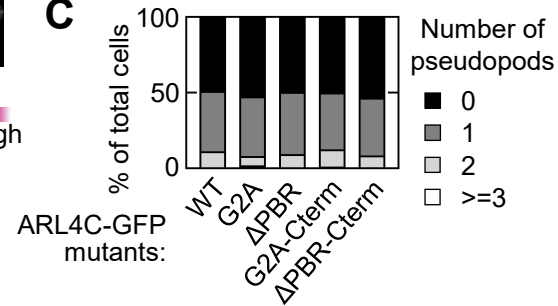**D**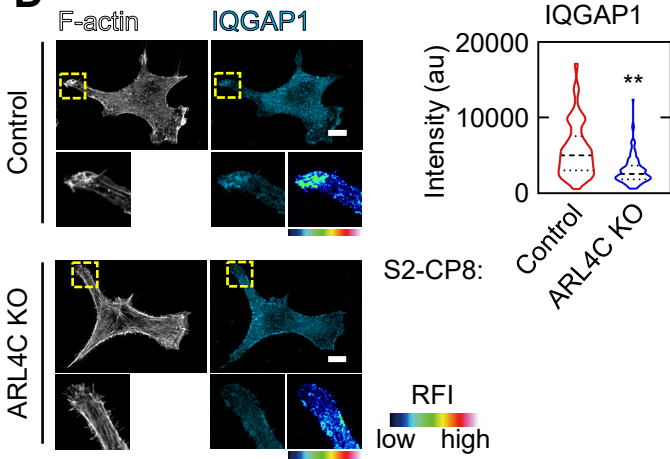

S2-CP8:

RFI  
low high**H**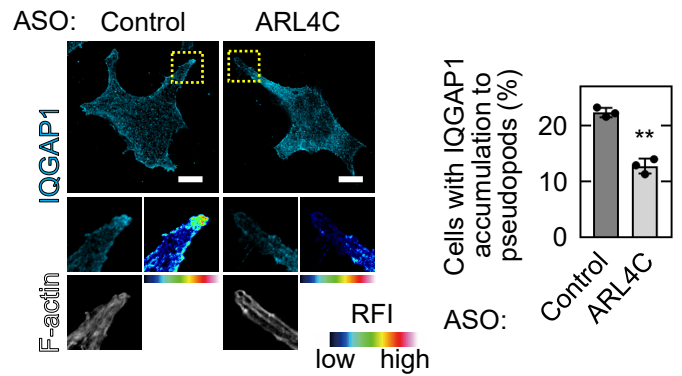**E**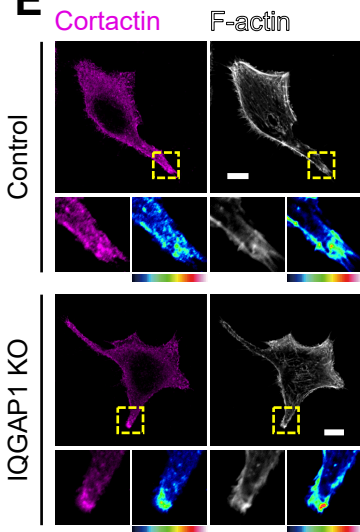**F**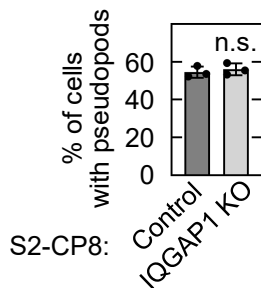**G**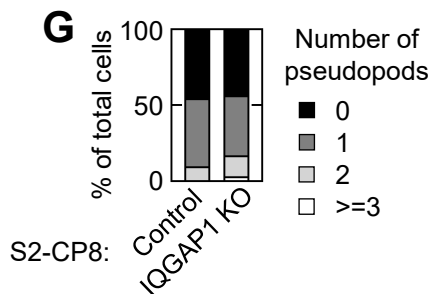**I**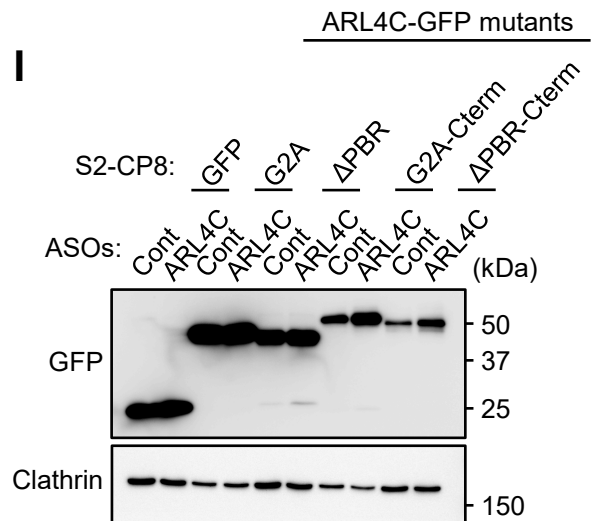

Supplement: supp [file elife-66721-supp-v1.zip]

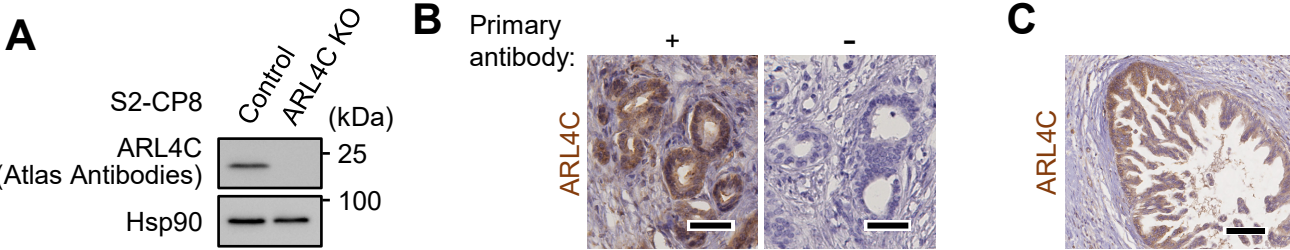

Supplement: supp [file elife-66721-supp-v1.zip]

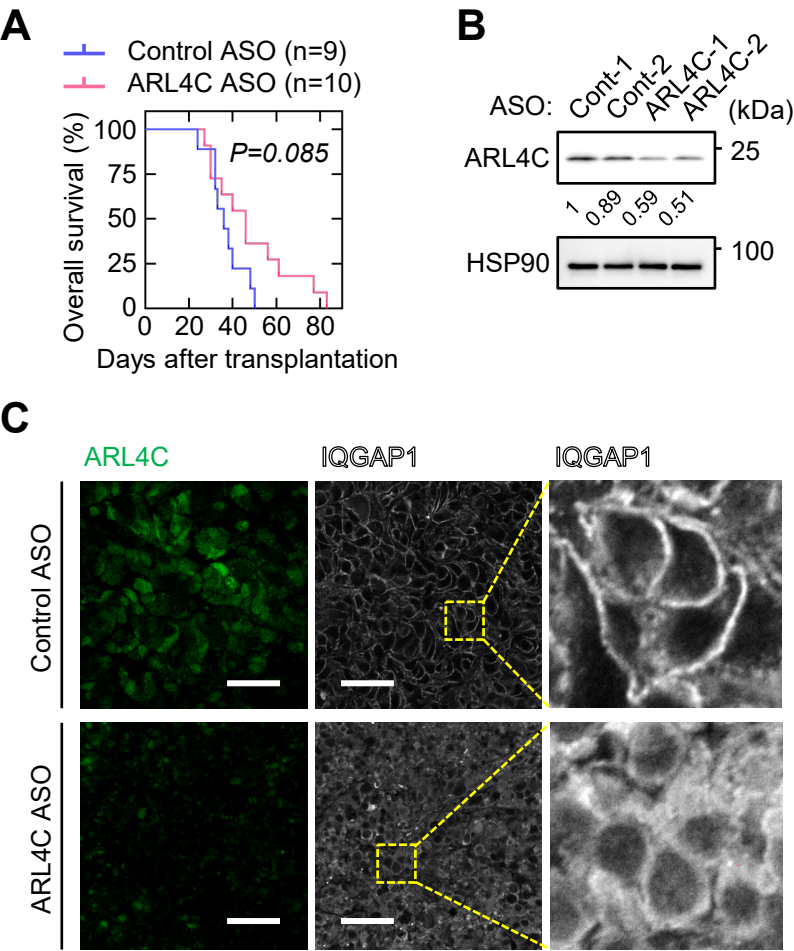

Supplement: supp [file elife-66721-supp-v1.zip]

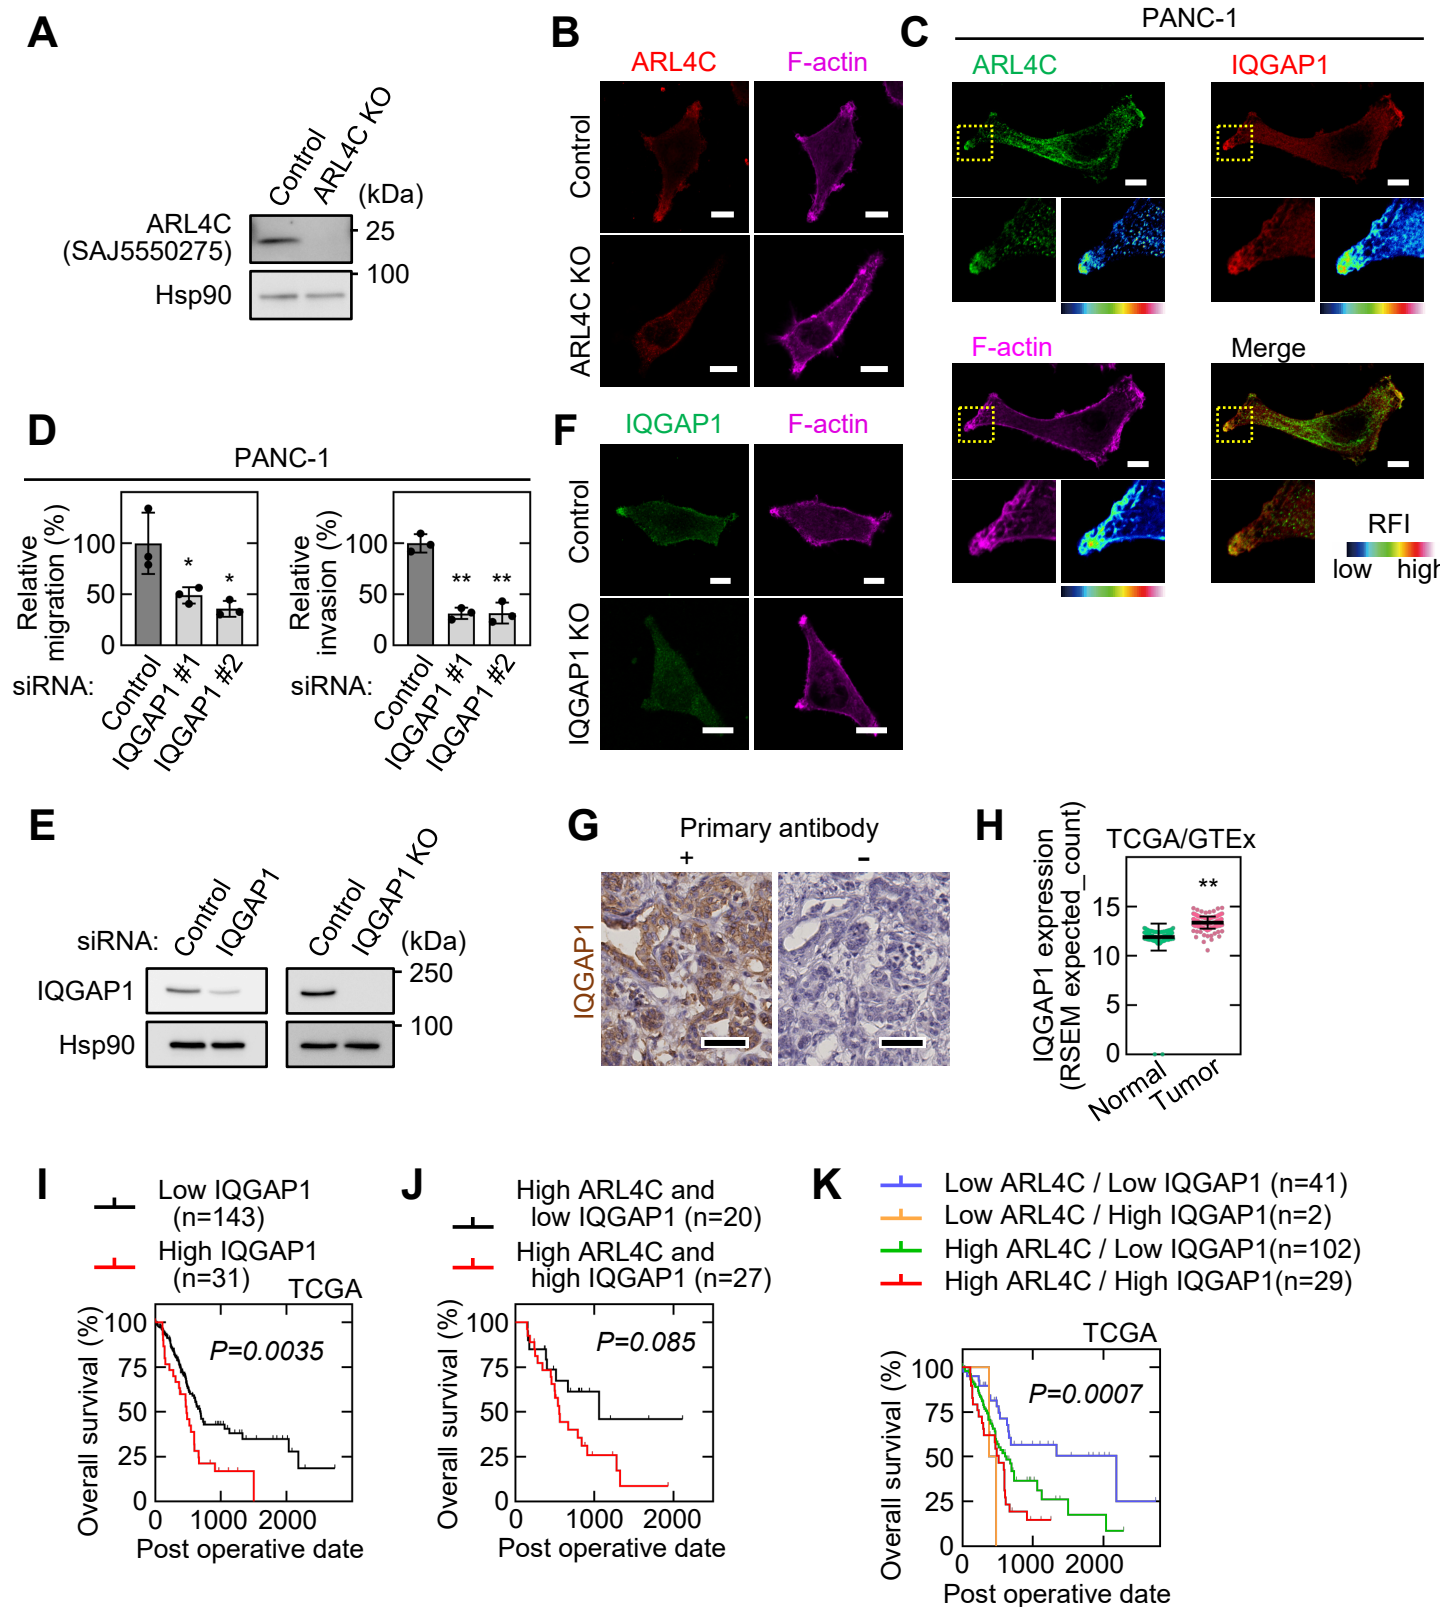

Supplement: supp [file elife-66721-supp-v1.zip]

**A**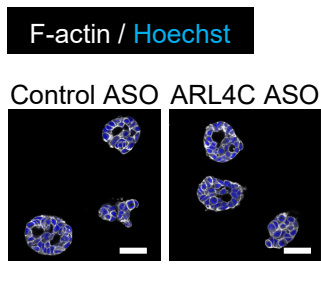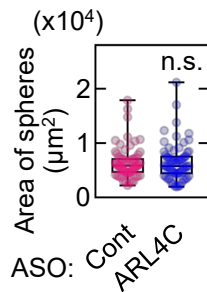**B**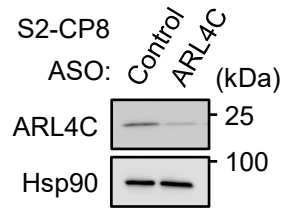**C**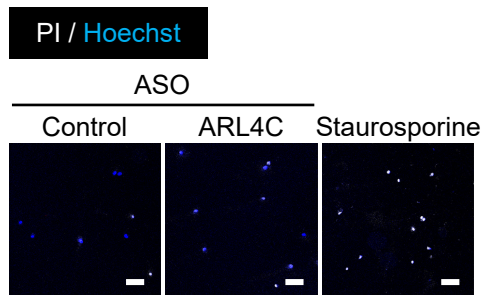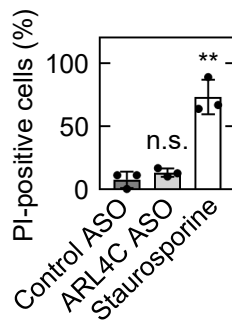**D**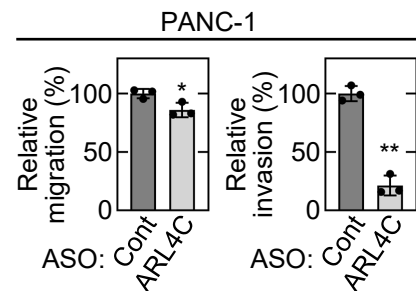**E**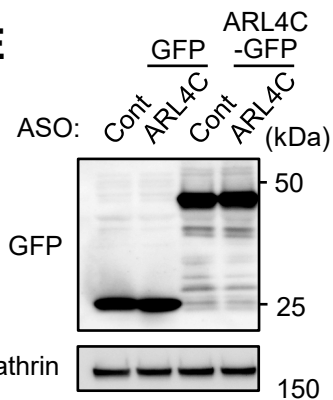**G**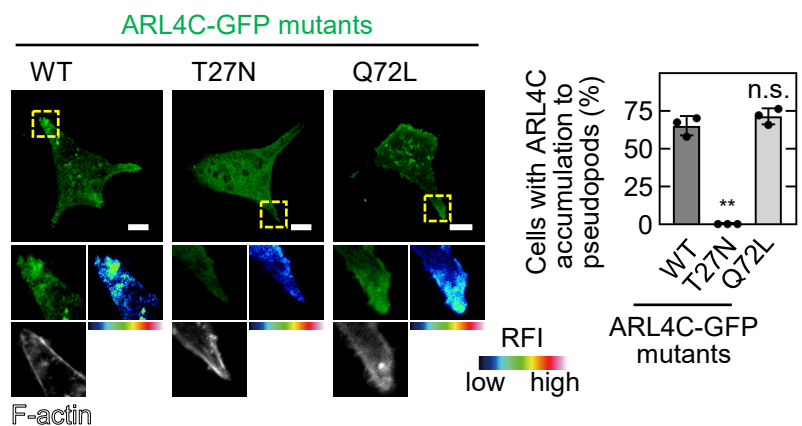**F**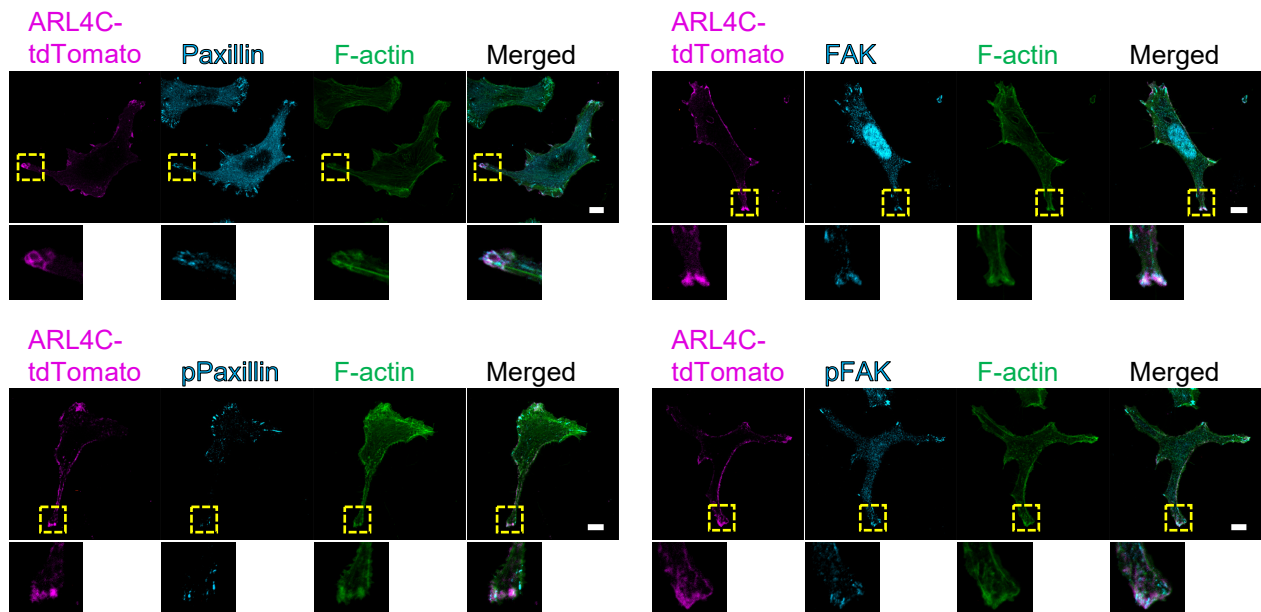

Supplement: supp [file elife-66721-supp-v1.zip]

**A**

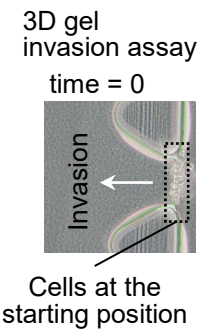

**B**

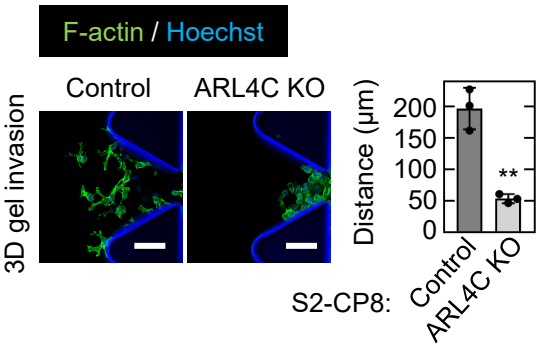

Supplement: supp [file elife-66721-supp-v1.zip]

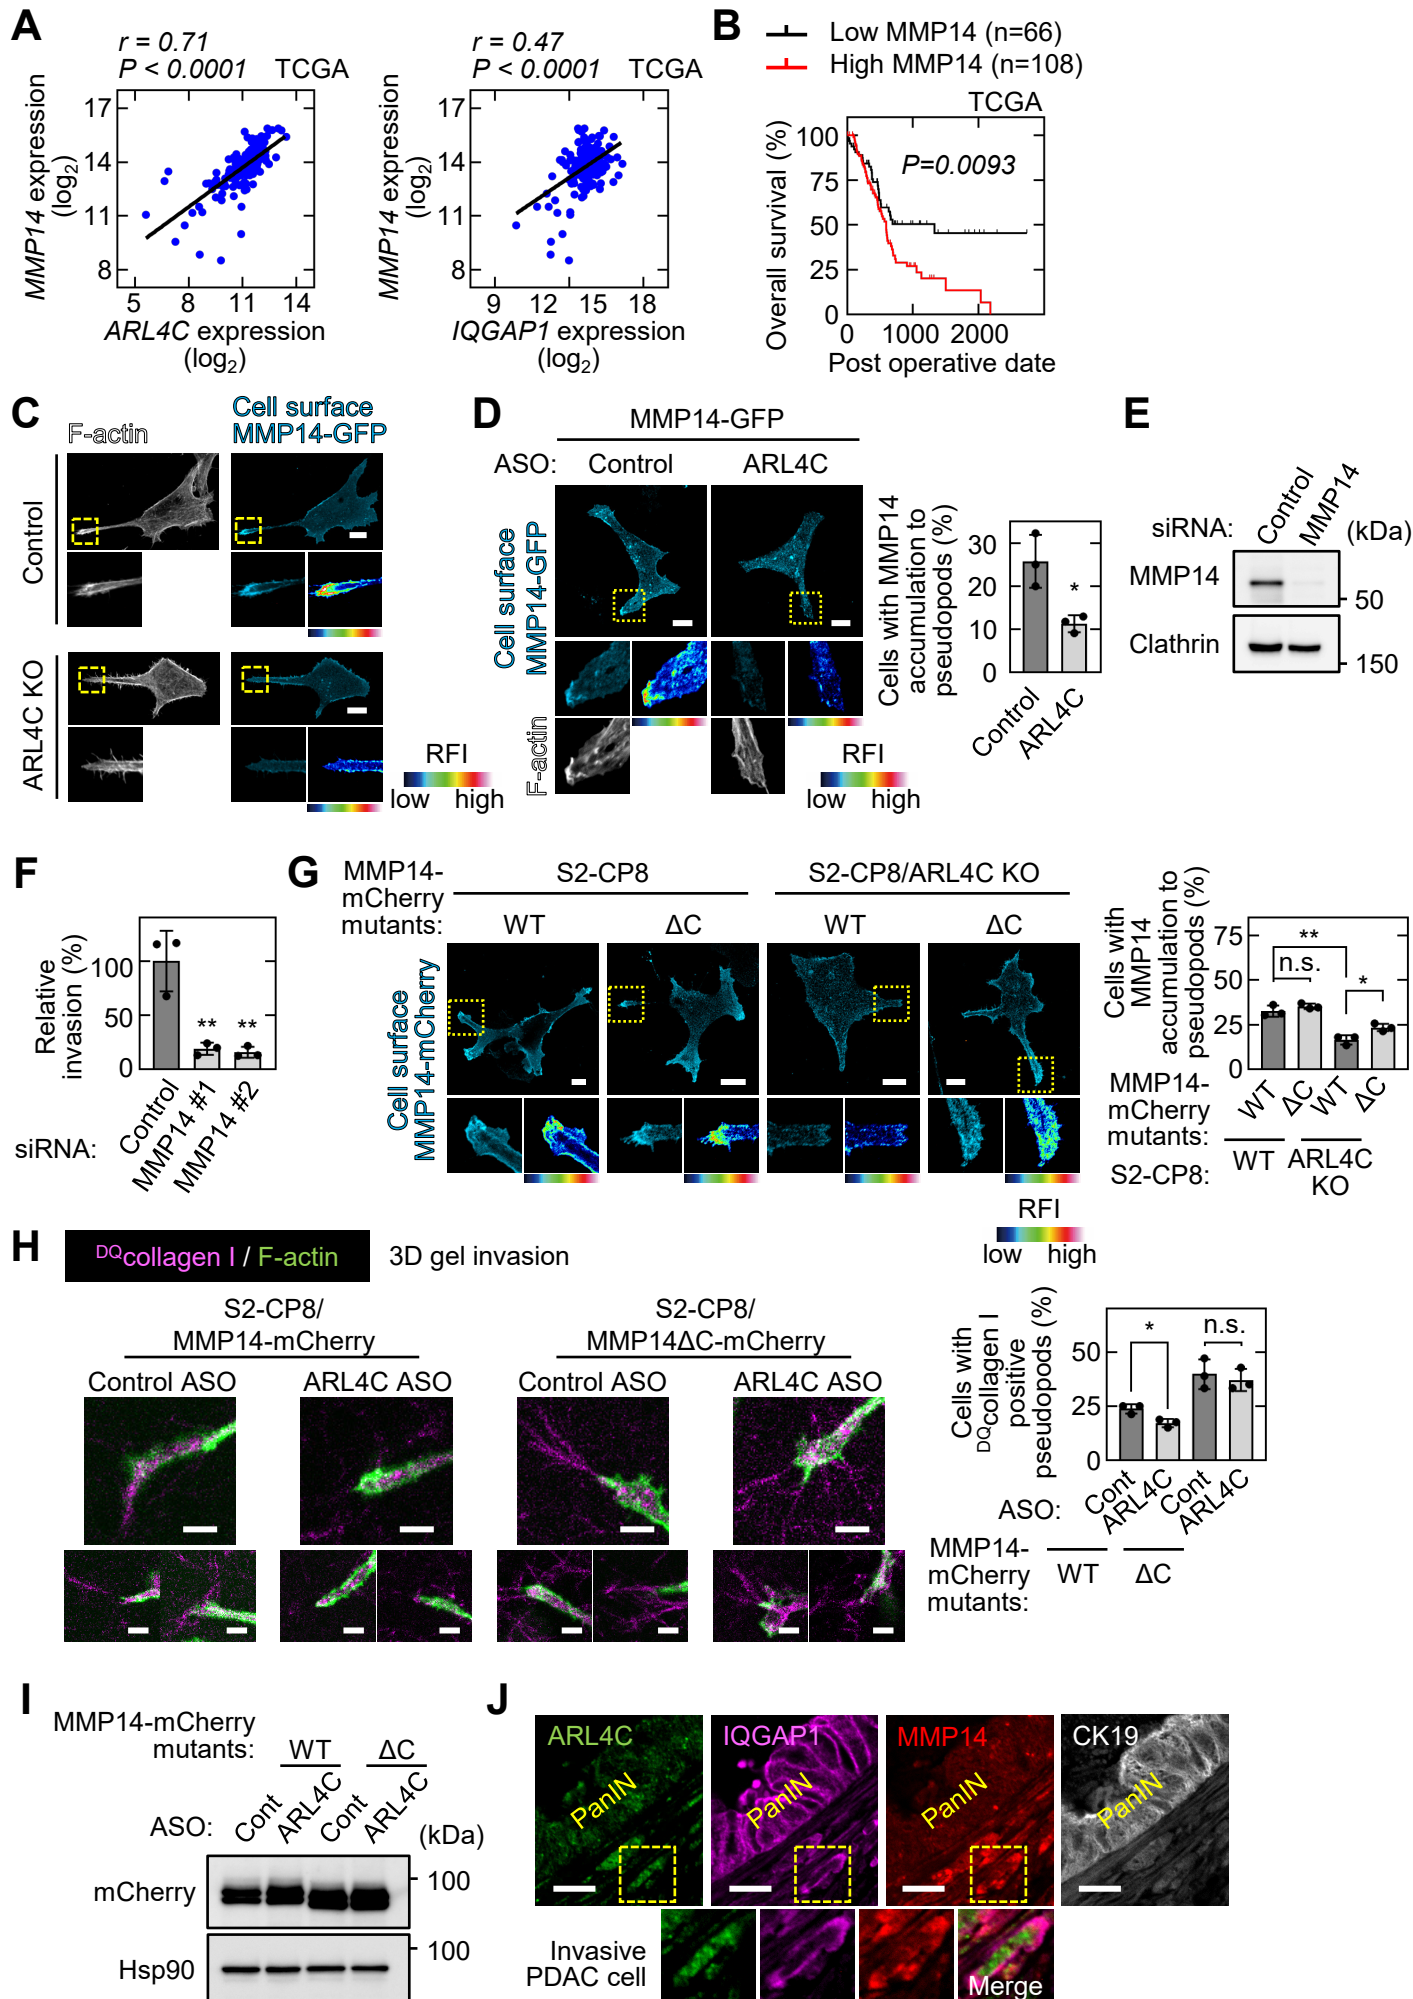

Supplement: supp [file elife-66721-supp-v1.zip]
